# Supplementary material for: Antimicrobial Activity and Chemical Constitution of the Crude, Phenolic-Rich Extracts of Hibiscus sabdariffa, Brassica oleracea and Beta vulgaris
Source: PubMed Central journal article supplement (PMC6930538; doi:10.3390/molecules24234280), 2019-11-24
Supplement: molecules-24-04280-s001.pdf [file molecules-24-04280-s001.pdf]

## Supplementary Materials

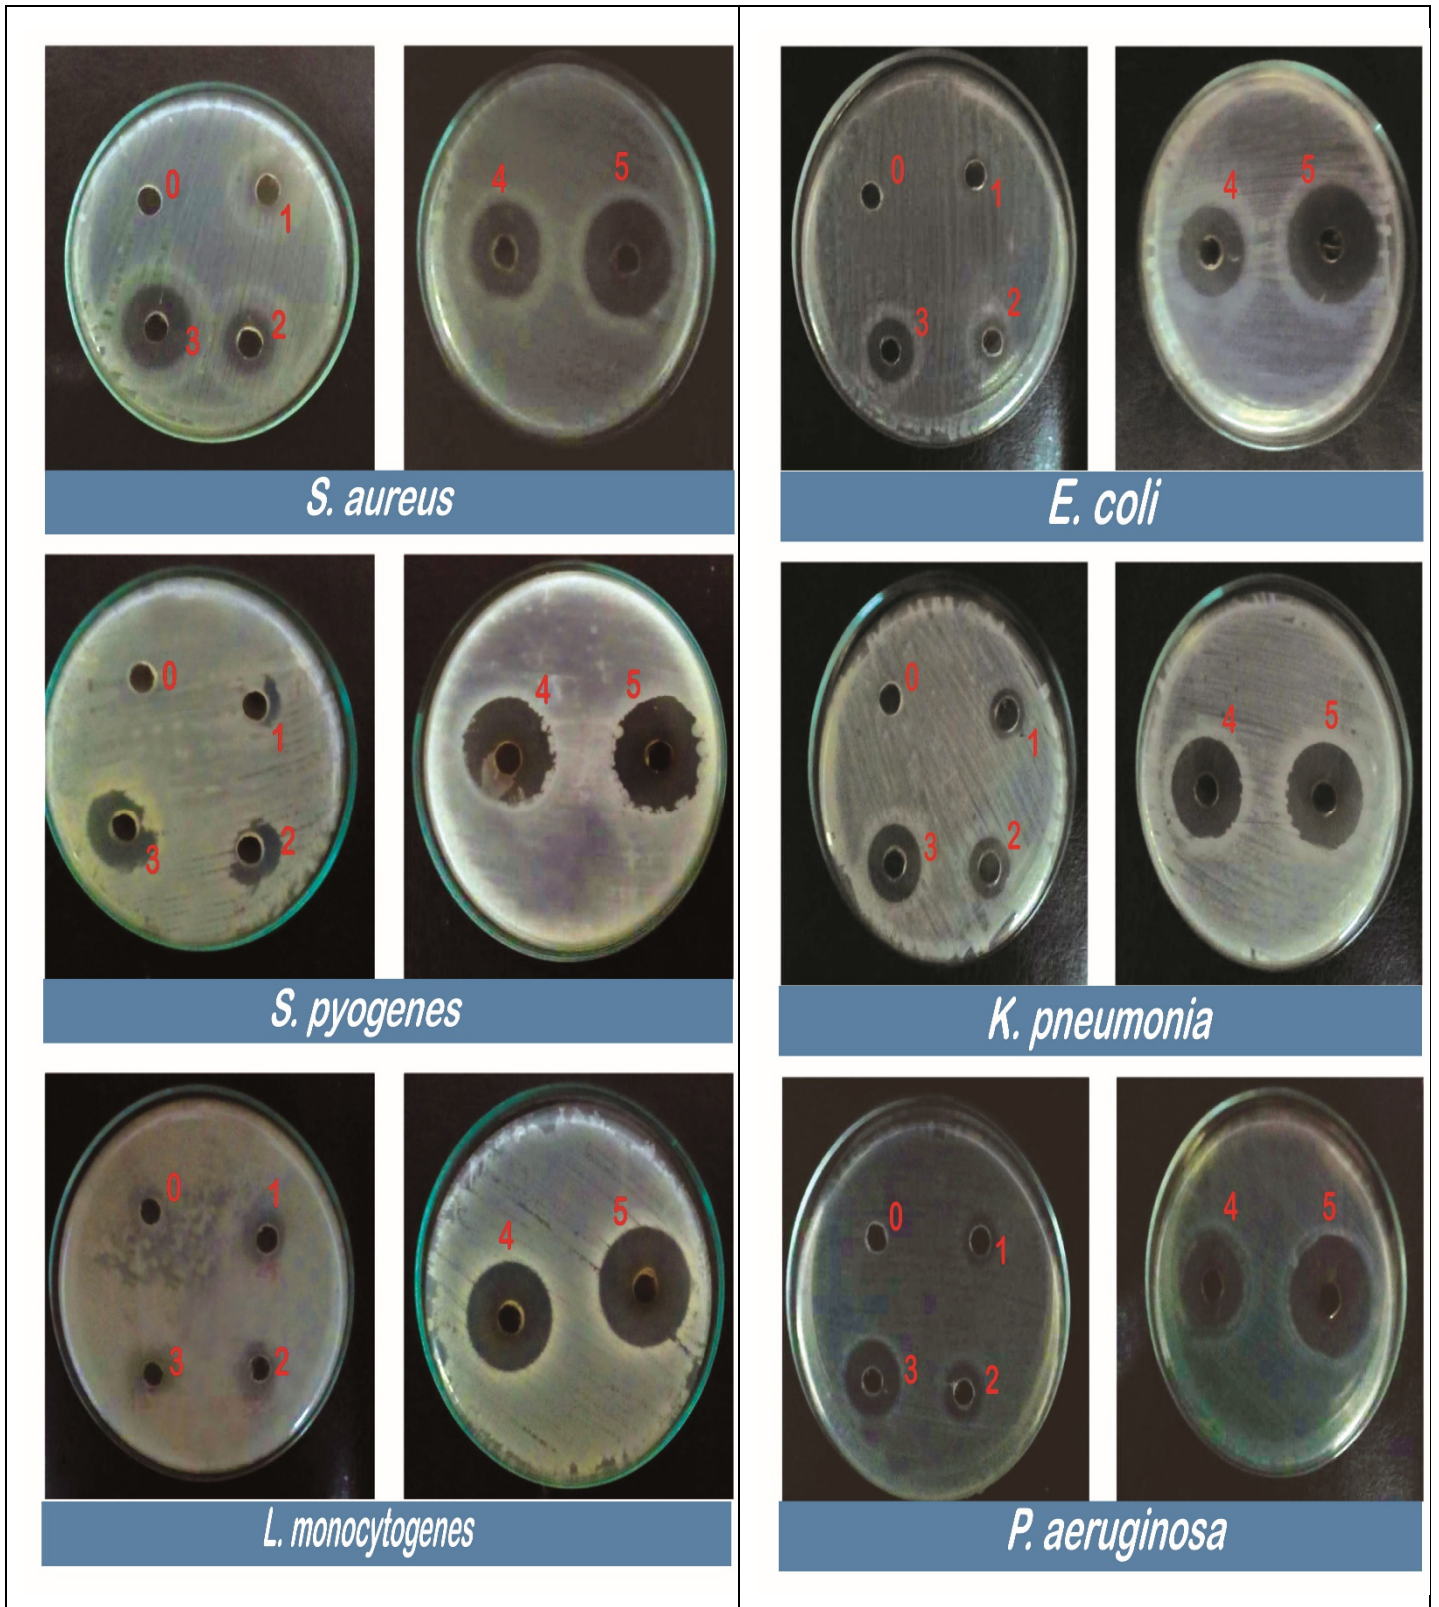

**Figure S1.** Antibacterial activity of HCPRE at different concentrations against Gram +ve bacteria. 0 ,1, 2, 3, 4 and 5 refer to (0 ,25, 50, 100, 200 and 250  $\mu\text{g/mL}$ , respectively).

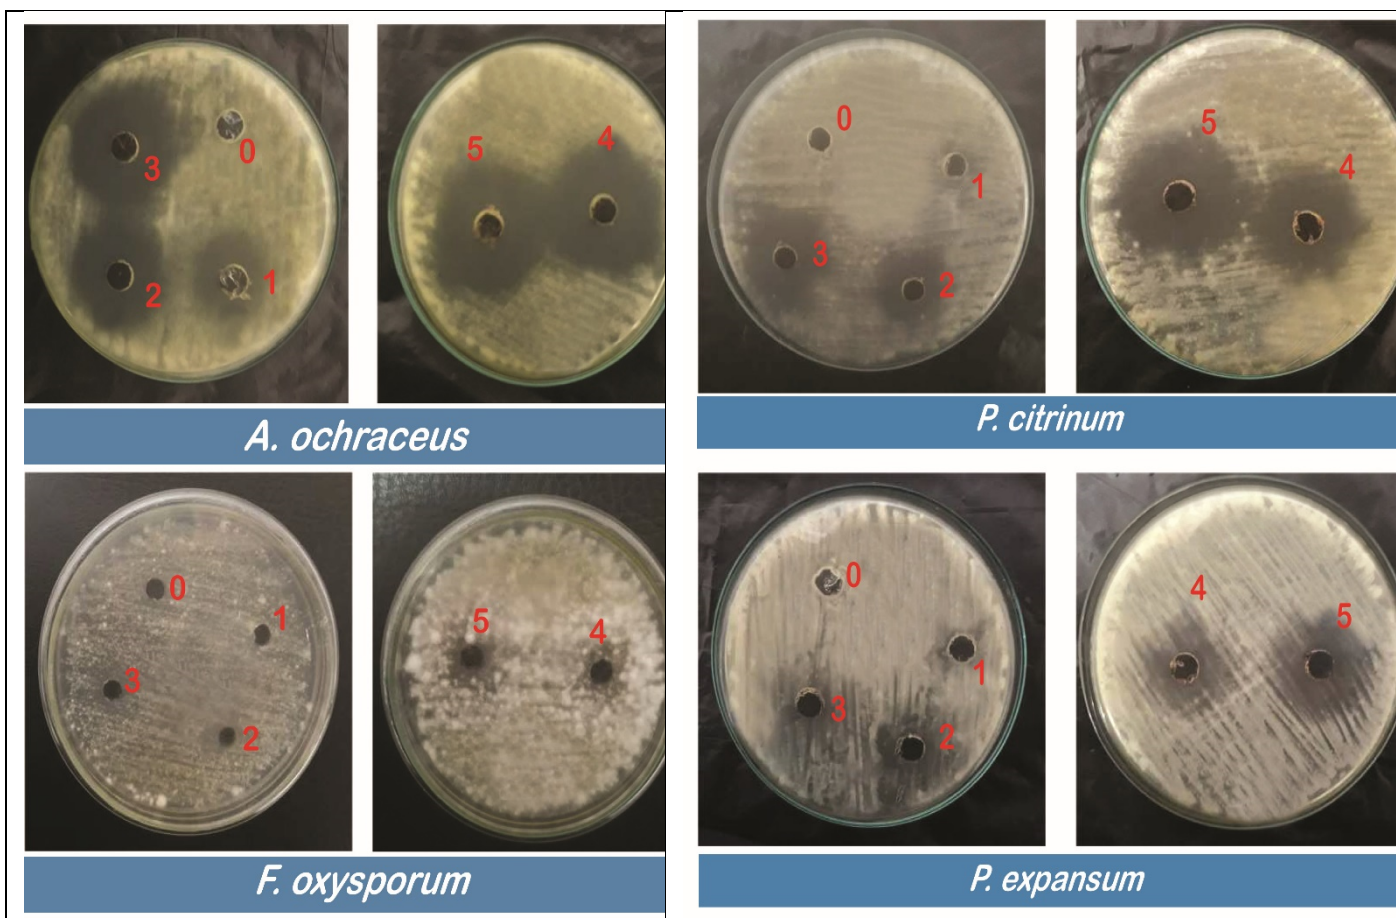

**Figure S2.** Antifungal activity of HCPRE at different concentrations against pathogenic fungi. 0, 1, 2, 3, 4 and 5 refer to (0,100,200,300,400 and 500  $\mu\text{g/mL}$ , respectively).

# My GC-MS Report

Low Mass(m/z): 45  
 High Mass(m/z): 500

Sample Name:  
 Instrument Method:

C:\Xcalibur\methods\dr\_zedan\_1  
 5\_5\_2018\_3.meth

Original Processing Method:

RT: 0.00 - 30.35

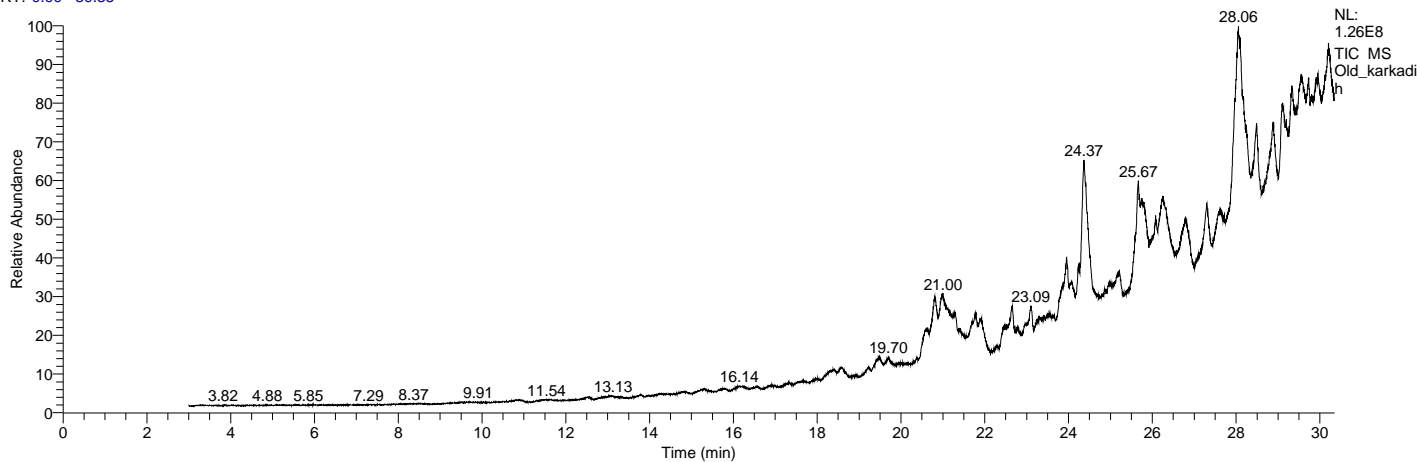

| RT    | Area % | Peak Height |
|-------|--------|-------------|
| 10.88 | 0.14   | 538512.38   |
| 12.51 | 0.20   | 630104.23   |
| 12.92 | 0.19   | 642125.00   |
| 13.07 | 0.42   | 751828.45   |
| 13.79 | 0.15   | 562703.47   |
| 14.81 | 0.25   | 606298.63   |
| 15.28 | 0.53   | 1013902.24  |
| 15.79 | 0.26   | 700434.76   |
| 16.14 | 0.45   | 1009813.60  |
| 16.57 | 0.19   | 671097.30   |
| 16.89 | 0.23   | 608785.58   |
| 17.28 | 0.10   | 679623.87   |
| 17.34 | 0.13   | 734319.58   |
| 17.58 | 0.17   | 641155.85   |
| 17.67 | 0.15   | 691284.14   |
| 17.97 | 0.23   | 661513.92   |
| 18.30 | 0.40   | 1267231.33  |
| 18.37 | 0.22   | 1317397.10  |
| 18.59 | 0.55   | 1895282.49  |
| 19.22 | 0.31   | 1360199.60  |
| 19.46 | 0.91   | 2675821.18  |
| 19.70 | 0.49   | 2013635.02  |
| 20.37 | 0.09   | 754566.00   |
| 20.57 | 1.20   | 4029558.74  |
| 20.80 | 1.57   | 7502846.04  |
| 21.00 | 1.86   | 6099129.53  |
| 21.30 | 0.64   | 3482214.05  |
| 21.41 | 0.10   | 835523.49   |
| 21.78 | 2.24   | 7537882.87  |
| 21.90 | 1.86   | 6400354.79  |
| 22.29 | 0.15   | 813813.16   |
| 22.46 | 1.22   | 4763386.07  |
| 22.65 | 2.23   | 8653218.10  |
| 22.78 | 0.28   | 1620654.42  |
| 22.97 | 0.49   | 2853198.32  |
| 23.10 | 1.60   | 7623824.67  |
| 23.24 | 0.32   | 2432460.41  |
| 23.31 | 0.56   | 3022505.07  |
| 23.41 | 0.49   | 2541686.28  |
| 23.53 | 0.96   | 2643637.54  |
| 23.95 | 4.89   | 14368473.34 |
| 24.06 | 1.14   | 5302989.69  |
| 24.23 | 0.33   | 3262606.93  |
| 24.37 | 7.72   | 29616094.26 |

# My GC-MS Report

| RT    | Area % | Peak Height |
|-------|--------|-------------|
| 24.86 | 0.10   | 1060139.74  |
| 24.96 | 0.30   | 1628386.21  |
| 25.21 | 1.26   | 5307599.93  |
| 25.66 | 5.60   | 23599657.98 |
| 25.74 | 4.19   | 16154381.26 |
| 26.08 | 0.46   | 3962072.11  |
| 26.25 | 4.18   | 11297098.03 |
| 26.79 | 3.79   | 10355995.76 |
| 27.30 | 2.97   | 12504928.95 |
| 27.58 | 2.35   | 6486876.44  |
| 28.05 | 13.79  | 37196398.48 |
| 28.25 | 0.28   | 2810545.29  |
| 28.49 | 3.50   | 16893329.32 |
| 28.88 | 4.29   | 15829430.41 |
| 29.10 | 4.04   | 16621609.26 |
| 29.33 | 1.96   | 11039890.71 |
| 29.55 | 2.26   | 8700632.45  |
| 29.73 | 0.67   | 6080665.72  |
| 29.80 | 0.10   | 1309023.41  |
| 29.95 | 1.57   | 6611743.95  |
| 30.21 | 3.74   | 13877138.82 |

| RT    | Compound Name                       | Molecular Weight | Molecular Formula | Cas #      | Area % | Library         |
|-------|-------------------------------------|------------------|-------------------|------------|--------|-----------------|
| 10.88 | DOTRIACONTANE                       | 450              | C32H66            | 544-85-4   | 0.14   | WileyRegistry8e |
| 10.88 | 2,2,3,3,4,4 HEXADEUTERO OCTADECANAL | 274              | C18H30D6O         | 56554-51-9 | 0.14   | WileyRegistry8e |
| 10.88 | 1-HEXADECANOL, 2-METHYL-            | 256              | C17H36O           | 2490-48-4  | 0.14   | WileyRegistry8e |
| 10.88 | 1-Hexadecanol, 2-methyl-            | 256              | C17H36O           | 2490-48-4  | 0.14   | mainlib         |

Hit Spectrum

Compound Structure

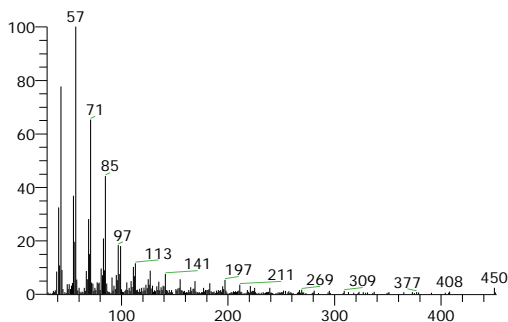

DOTRIACONTANE  
Formula C32H66, MW 450, CAS# 544-85-4, Entry# 274478  
A13-52367

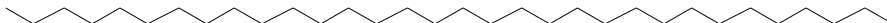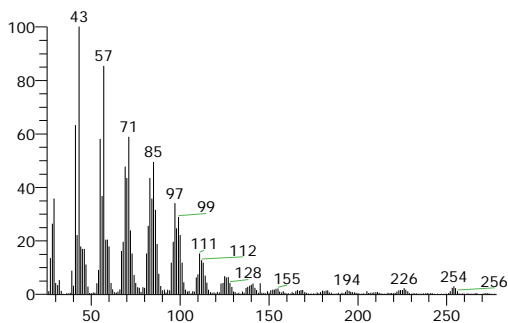

2,2,3,3,4,4 HEXADEUTERO OCTADECANAL  
Formula C18H30D6O, MW 274, CAS# 56554-51-9, Entry# 159360

# My GC-MS Report

Hit Spectrum

Compound Structure

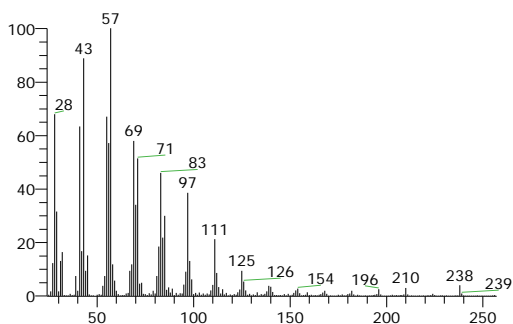

1-HEXADECANOL, 2-METHYL-  
Formula C<sub>17</sub>H<sub>36</sub>O, MW 256, CAS# 2490-48-4, Entry# 146911  
2-METHYLHEXADECAN-1-OL

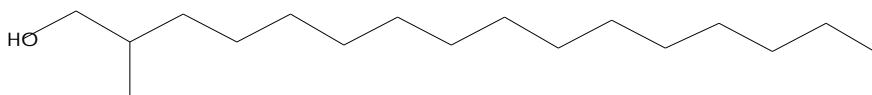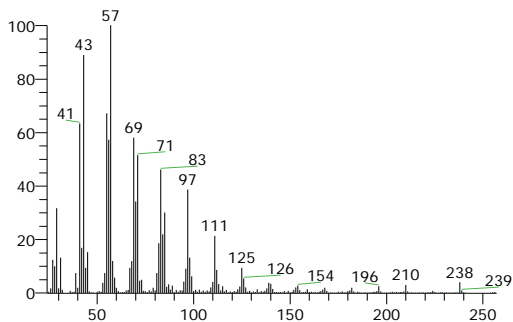

1-Hexadecanol, 2-methyl-  
Formula C<sub>17</sub>H<sub>36</sub>O, MW 256, CAS# 2490-48-4, Entry# 20717  
2-Methylhexadecan-1-ol

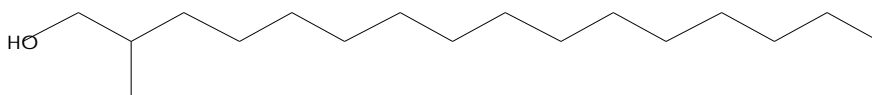

| RT    | Compound Name                       | Molecular Weight | Molecular Formula                                | Cas #      | Area % | Library         |
|-------|-------------------------------------|------------------|--------------------------------------------------|------------|--------|-----------------|
| 12.51 | 2,2-DIDEUTERO OCTADECANAL           | 270              | C <sub>18</sub> H <sub>34</sub> D <sub>2</sub> O | 56555-07-8 | 0.20   | WileyRegistry8e |
| 12.51 | 2,2,3,3,4,4 HEXADEUTERO OCTADECANAL | 274              | C <sub>18</sub> H <sub>30</sub> D <sub>6</sub> O | 56554-51-9 | 0.20   | WileyRegistry8e |
| 12.51 | DOTRIACONTANE                       | 450              | C <sub>32</sub> H <sub>66</sub>                  | 544-85-4   | 0.20   | WileyRegistry8e |
| 12.51 | 1-HEXADECANOL, 2-METHYL-            | 256              | C <sub>17</sub> H <sub>36</sub> O                | 2490-48-4  | 0.20   | WileyRegistry8e |

Hit Spectrum

Compound Structure

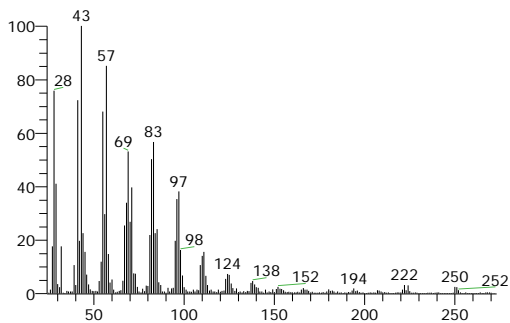

2,2-DIDEUTERO OCTADECANAL  
Formula C<sub>18</sub>H<sub>34</sub>D<sub>2</sub>O, MW 270, CAS# 56555-07-8, Entry# 159359

# My GC-MS Report

Hit Spectrum

Compound Structure

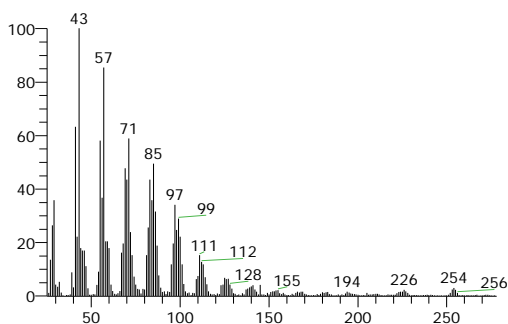

2,2,3,3,4,4 HEXADEUTERO OCTADECANAL  
Formula C18H30D6O, MW 274, CAS# 56554-51-9, Entry# 159360

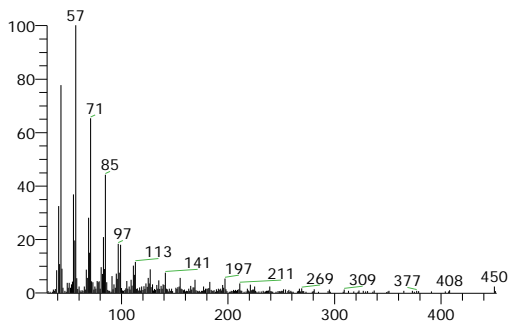

DOTRIACONTANE  
Formula C32H66, MW 450, CAS# 544-85-4, Entry# 274478  
AI3-52367

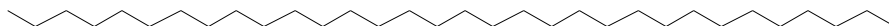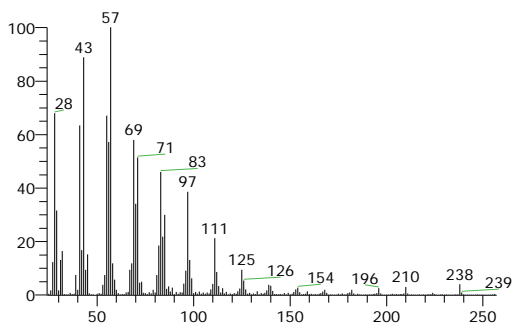

1-HEXADECANOL, 2-METHYL-  
Formula C17H36O, MW 256, CAS# 2490-48-4, Entry# 146911  
2-METHYLHEXADECAN-1-OL

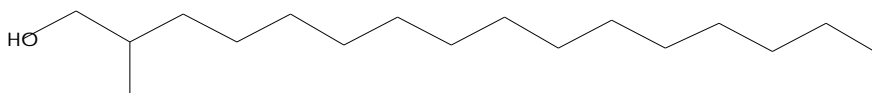

| RT    | Compound Name                       | Molecular Weight | Molecular Formula | Cas #      | Area % | Library         |
|-------|-------------------------------------|------------------|-------------------|------------|--------|-----------------|
| 12.92 | DOTRIACONTANE                       | 450              | C32H66            | 544-85-4   | 0.19   | WileyRegistry8e |
| 12.92 | 1-HEXADECANOL, 2-METHYL-            | 256              | C17H36O           | 2490-48-4  | 0.19   | WileyRegistry8e |
| 12.92 | 2,2-DIDEUTERO OCTADECANAL           | 270              | C18H34D2O         | 56555-07-8 | 0.19   | WileyRegistry8e |
| 12.92 | 2,2,3,3,4,4 HEXADEUTERO OCTADECANAL | 274              | C18H30D6O         | 56554-51-9 | 0.19   | WileyRegistry8e |

# My GC-MS Report

Hit Spectrum

Compound Structure

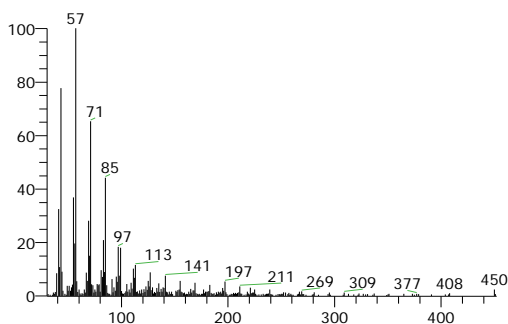

**DOTRIACONTANE**  
 Formula C32H66, MW 450, CAS# 544-85-4, Entry# 274478  
 A13-52367

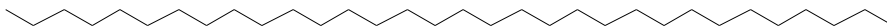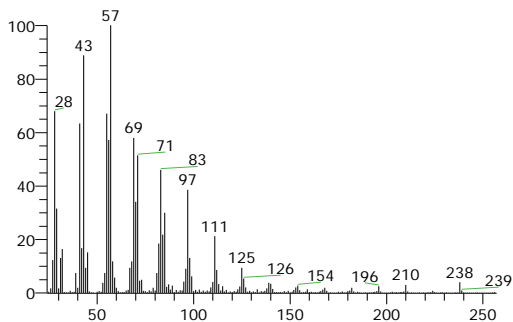

**1-HEXADECANOL, 2-METHYL-2-METHYLHEXADECAN-1-OL**  
 Formula C17H36O, MW 256, CAS# 2490-48-4, Entry# 146911

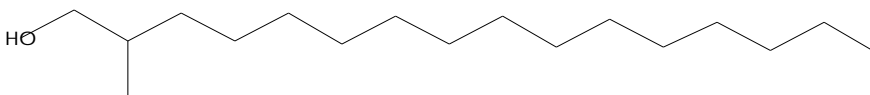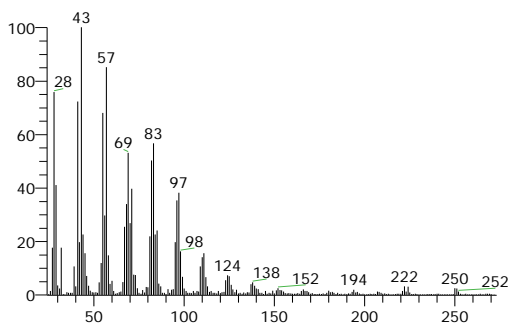

**2,2-DIDEUTERO OCTADECANAL**  
 Formula C18H34D2O, MW 270, CAS# 56555-07-8, Entry# 159359

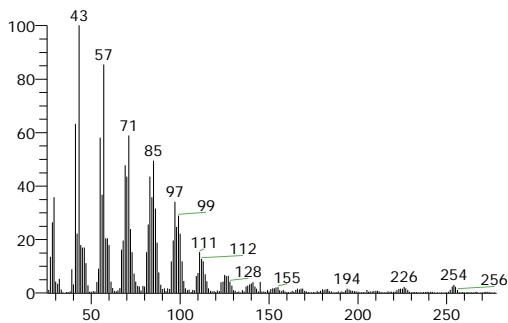

**2,2,3,3,4,4 HEXADEUTERO OCTADECANAL**  
 Formula C18H30D6O, MW 274, CAS# 56554-51-9, Entry# 159360

| RT    | Compound Name                       | Molecular Weight | Molecular Formula | Cas #      | Area % | Library         |
|-------|-------------------------------------|------------------|-------------------|------------|--------|-----------------|
| 13.07 | DOTRIACONTANE                       | 450              | C32H66            | 544-85-4   | 0.42   | WileyRegistry8e |
| 13.07 | 2,2-DIDEUTERO OCTADECANAL           | 270              | C18H34D2O         | 56555-07-8 | 0.42   | WileyRegistry8e |
| 13.07 | 2,2,3,3,4,4 HEXADEUTERO OCTADECANAL | 274              | C18H30D6O         | 56554-51-9 | 0.42   | WileyRegistry8e |
| 13.07 | Hexadecane, 1,1-bis(dodecyloxy)-    | 594              | C40H82O2          | 56554-64-4 | 0.42   | mainlib         |

# My GC-MS Report

Hit Spectrum

Compound Structure



**DOTRIACONTANE**  
 Formula C32H66, MW 450, CAS# 544-85-4, Entry# 274478  
 A13-52367

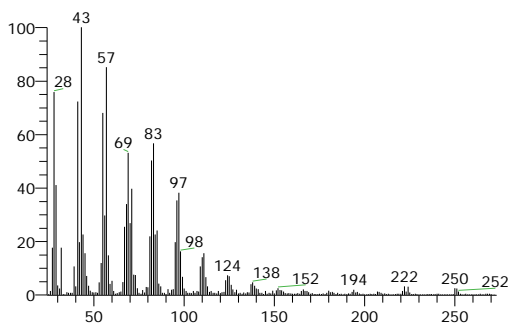

**2,2-DIDEUTERO OCTADECANAL**  
 Formula C18H34D2O, MW 270, CAS# 56555-07-8, Entry# 159359

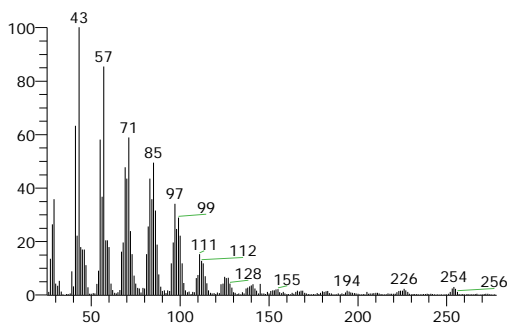

**2,2,3,3,4,4 HEXADEUTERO OCTADECANAL**  
 Formula C18H30D6O, MW 274, CAS# 56554-51-9, Entry# 159360

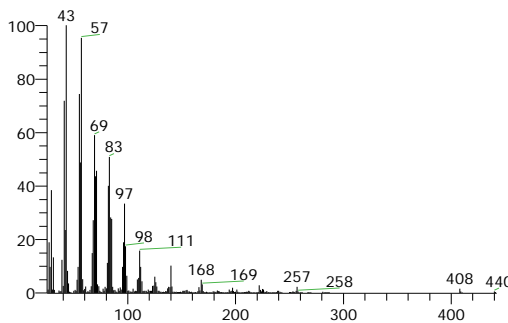

**Hexadecane, 1,1-bis(dodecyloxy)-**  
 Formula C40H82O2, MW 594, CAS# 56554-64-4, Entry# 6971  
 1,1-Bis(dodecyloxy)hexadecane #

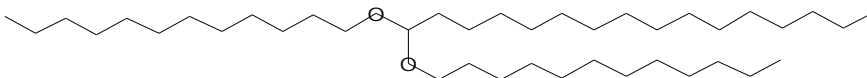

| RT    | Compound Name                       | Molecular Weight | Molecular Formula | Cas #      | Area % | Library         |
|-------|-------------------------------------|------------------|-------------------|------------|--------|-----------------|
| 13.79 | 2,2,3,3,4,4 HEXADEUTERO OCTADECANAL | 274              | C18H30D6O         | 56554-51-9 | 0.15   | WileyRegistry8e |
| 13.79 | 1-HEXADECANOL, 2-METHYL-            | 256              | C17H36O           | 2490-48-4  | 0.15   | WileyRegistry8e |
| 13.79 | DOTRIACONTANE                       | 450              | C32H66            | 544-85-4   | 0.15   | WileyRegistry8e |
| 13.79 | 1-Hexadecanol, 2-methyl-            | 256              | C17H36O           | 2490-48-4  | 0.15   | mainlib         |



# My GC-MS Report

Hit Spectrum

Compound Structure



2,2,3,3,4,4 HEXADEUTERO OCTADECANAL  
Formula C<sub>18</sub>H<sub>30</sub>D<sub>6</sub>O, MW 274, CAS# 56554-51-9, Entry# 159360

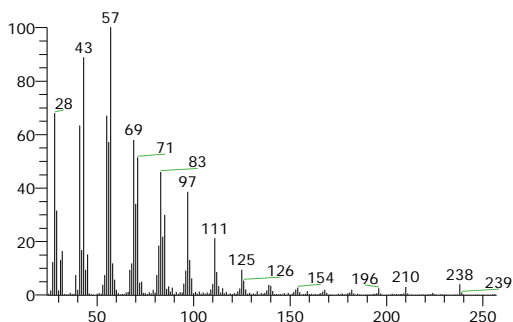

1-HEXADECANOL, 2-METHYL-  
2-METHYLHEXADECAN-1-OL  
Formula C<sub>17</sub>H<sub>36</sub>O, MW 256, CAS# 2490-48-4, Entry# 146911

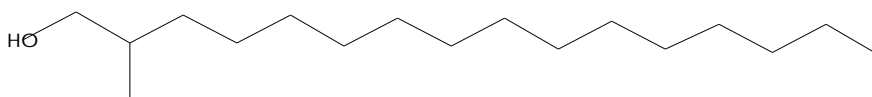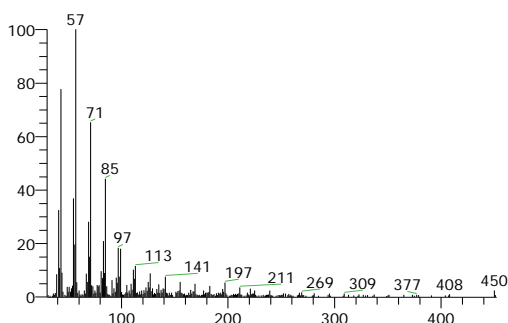

DOTRIACONTANE  
Formula C<sub>32</sub>H<sub>66</sub>, MW 450, CAS# 544-85-4, Entry# 274478  
AI3-52367

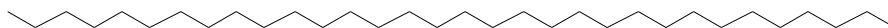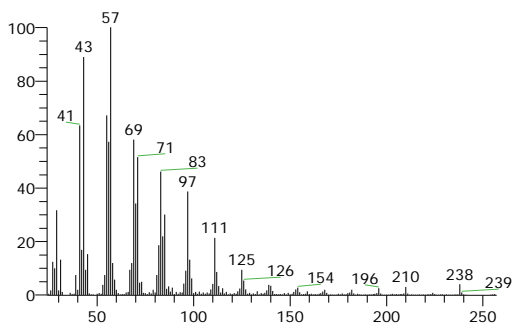

1-Hexadecanol, 2-methyl-  
2-Methylhexadecan-1-ol  
Formula C<sub>17</sub>H<sub>36</sub>O, MW 256, CAS# 2490-48-4, Entry# 20717

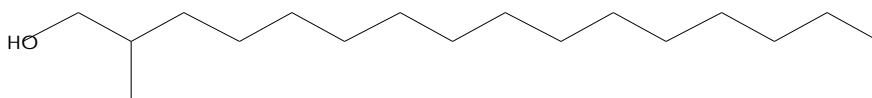

| RT    | Compound Name                                    | Molecular Weight | Molecular Formula                                | Cas #      | Area % | Library         |
|-------|--------------------------------------------------|------------------|--------------------------------------------------|------------|--------|-----------------|
| 14.81 | 2,2-DIDEUTERO OCTADECANAL                        | 270              | C <sub>18</sub> H <sub>34</sub> D <sub>2</sub> O | 56555-07-8 | 0.25   | WileyRegistry8e |
| 14.81 | DOTRIACONTANE                                    | 450              | C <sub>32</sub> H <sub>66</sub>                  | 544-85-4   | 0.25   | WileyRegistry8e |
| 14.81 | 1,3,5-TRIAZINE-2,4-DIAMINE,<br>6-CHLORO-N-ETHYL- | 173              | C <sub>5</sub> H <sub>8</sub> CIN <sub>5</sub>   | 1007-28-9  | 0.25   | WileyRegistry8e |
| 14.81 | 14-á-H-PREGNA                                    | 288              | C <sub>21</sub> H <sub>36</sub>                  | NA         | 0.25   | WileyRegistry8e |

# My GC-MS Report

Hit Spectrum

Compound Structure

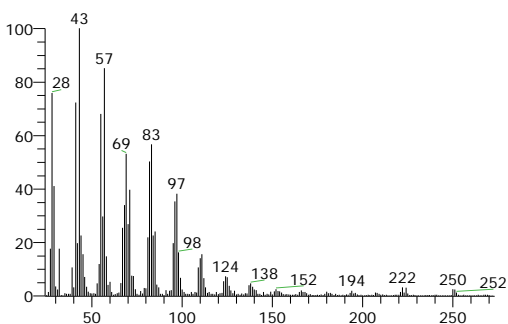

2,2-DIDEUTERO OCTADECANAL  
Formula C18H34D2O, MW 270, CAS# 56555-07-8, Entry# 159359

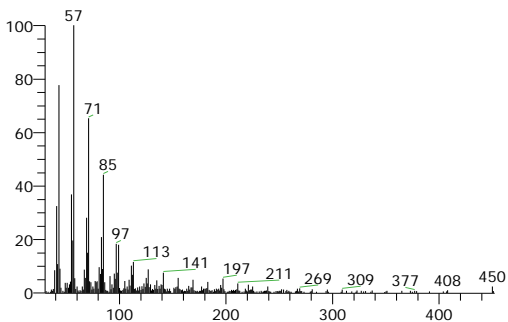

DOTRIACONTANE  
Formula C32H66, MW 450, CAS# 544-85-4, Entry# 274478  
A13-52367

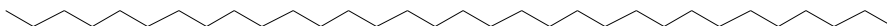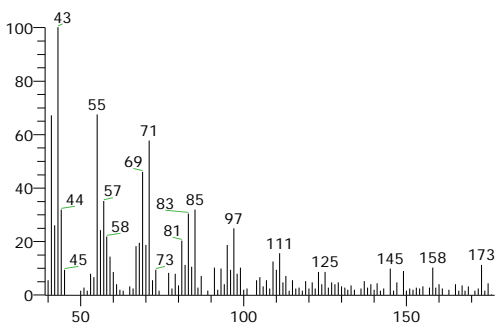

1,3,5-TRIAZINE-2,4-DIAMINE, 6-CHLORO-N-ETHYL-  
Formula C5H8ClN5, MW 173, CAS# 1007-28-9, Entry# 56163  
1,3, 5-TRIAZINE-2,4-DIAMINE, 6-CHLORO-N-ETHYL-

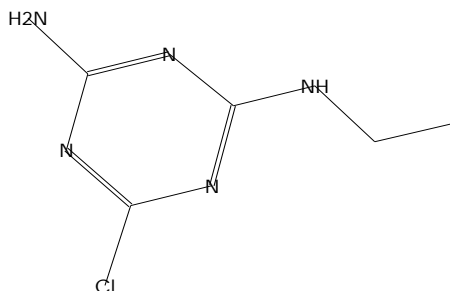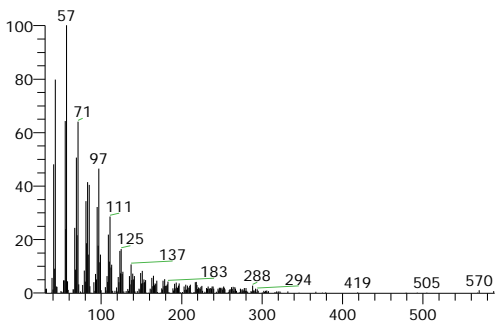

14- $\alpha$ -H-PREGNA  
Formula C21H36, MW 288, CAS# NA, Entry# 178939  
14- $\alpha$ -PREGNA

| RT    | Compound Name                        | Molecular Weight | Molecular Formula | Cas #      | Area % | Library         |
|-------|--------------------------------------|------------------|-------------------|------------|--------|-----------------|
| 15.28 | 2,2-DIDEUTERO OCTADECANAL            | 270              | C18H34D2O         | 56555-07-8 | 0.53   | WileyRegistry8e |
| 15.28 | DOTRIACONTANE                        | 450              | C32H66            | 544-85-4   | 0.53   | WileyRegistry8e |
| 15.28 | 12-Methyl-E,E-2,13-octadecadien-1-ol | 280              | C19H36O           | NA         | 0.53   | mainlib         |
| 15.28 | 7-Methyl-Z-tetradecen-1-ol acetate   | 268              | C17H32O2          | NA         | 0.53   | mainlib         |

# My GC-MS Report

Hit Spectrum

Compound Structure



2,2-DIDEUTERO OCTADECANAL  
Formula C18H34D2O, MW 270, CAS# 56555-07-8, Entry# 159359



DOTRIACONTANE  
Formula C32H66, MW 450, CAS# 544-85-4, Entry# 274478  
AI3-52367

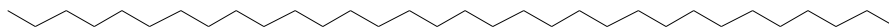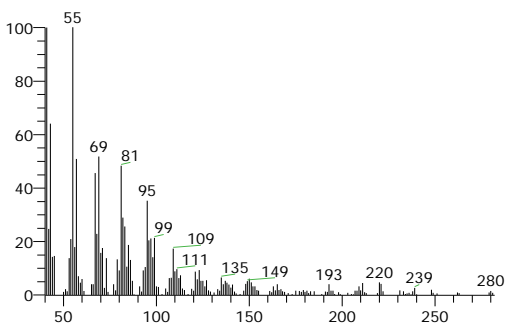

12-Methyl-E,E-2,13-octadecadien-1-ol  
Formula C19H36O, MW 280, CAS# NA, Entry# 16455

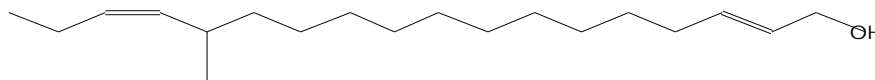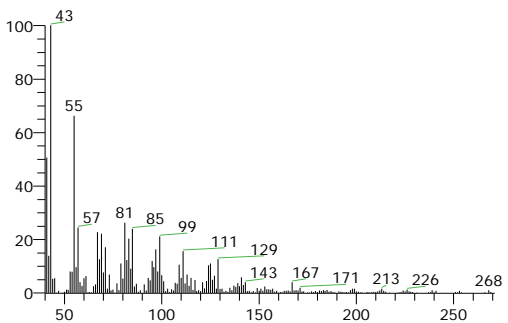

7-Methyl-Z-tetradecen-1-ol acetate  
Formula C17H32O2, MW 268, CAS# NA, Entry# 6342

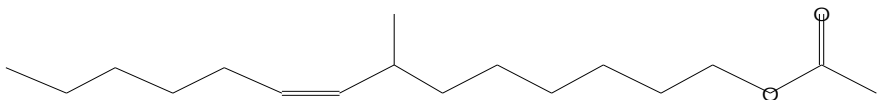

| RT    | Compound Name             | Molecular Weight | Molecular Formula | Cas #      | Area % | Library         |
|-------|---------------------------|------------------|-------------------|------------|--------|-----------------|
| 15.79 | 2,2-DIDEUTERO OCTADECANAL | 270              | C18H34D2O         | 56555-07-8 | 0.26   | WileyRegistry8e |
| 15.79 | 1-HEXADECANOL, 2-METHYL-  | 256              | C17H36O           | 2490-48-4  | 0.26   | WileyRegistry8e |
| 15.79 | 14-á-H-PREGNA             | 288              | C21H36            | NA         | 0.26   | WileyRegistry8e |
| 15.79 | 1-Hexadecanol, 2-methyl-  | 256              | C17H36O           | 2490-48-4  | 0.26   | mainlib         |

# My GC-MS Report

Hit Spectrum

Compound Structure



2,2-DIDEUTERO OCTADECANAL  
Formula C18H34D2O, MW 270, CAS# 56555-07-8, Entry# 159359

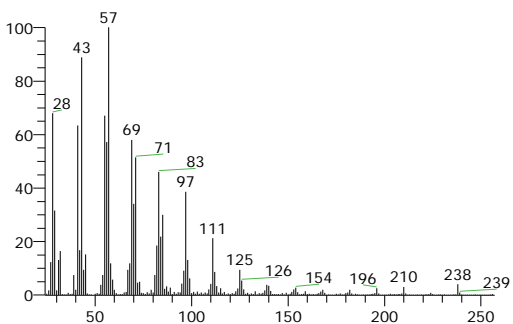

1-HEXADECANOL, 2-METHYL-  
2-METHYLHEXADECAN-1-OL  
Formula C17H36O, MW 256, CAS# 2490-48-4, Entry# 146911

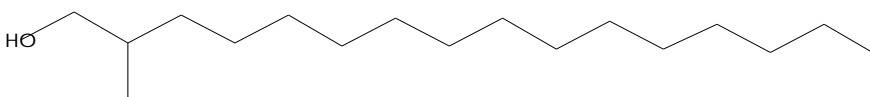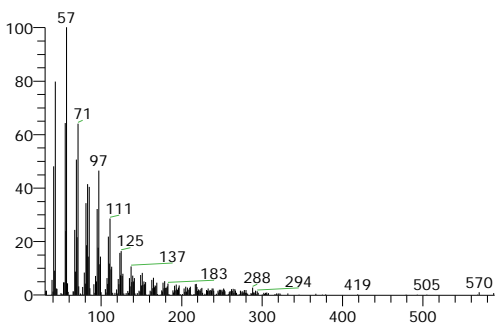

14- $\alpha$ -H-PREGNA  
Formula C21H36, MW 288, CAS# NA, Entry# 178939

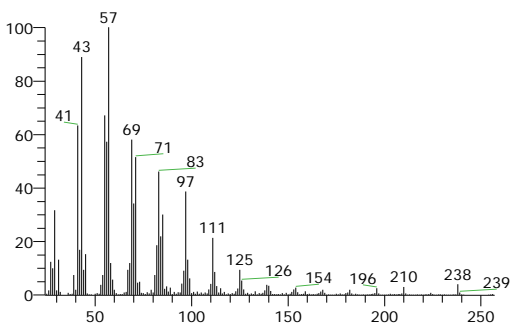

1-Hexadecanol, 2-methyl-  
2-Methylhexadecan-1-ol  
Formula C17H36O, MW 256, CAS# 2490-48-4, Entry# 20717

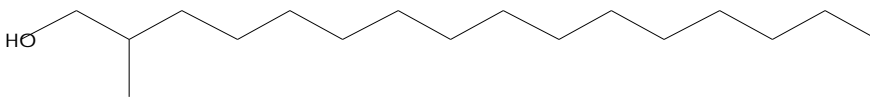

| RT    | Compound Name                                  | Molecular Weight | Molecular Formula | Cas #      | Area % | Library         |
|-------|------------------------------------------------|------------------|-------------------|------------|--------|-----------------|
| 16.14 | 2,2-DIDEUTERO OCTADECANAL                      | 270              | C18H34D2O         | 56555-07-8 | 0.45   | WileyRegistry8e |
| 16.14 | DOTRIACONTANE                                  | 450              | C32H66            | 544-85-4   | 0.45   | WileyRegistry8e |
| 16.14 | 1-HEXADECANOL, 2-METHYL-2-METHYLHEXADECAN-1-OL | 256              | C17H36O           | 2490-48-4  | 0.45   | WileyRegistry8e |
| 16.14 | 2,2,3,3,4,4 HEXADEUTERO OCTADECANAL            | 274              | C18H30D6O         | 56554-51-9 | 0.45   | WileyRegistry8e |

# My GC-MS Report

Hit Spectrum

Compound Structure



2,2-DIDEUTERO OCTADECANAL  
Formula C18H34D2O, MW 270, CAS# 56555-07-8, Entry# 159359



DOTRIACONTANE  
Formula C32H66, MW 450, CAS# 544-85-4, Entry# 274478  
A13-52367

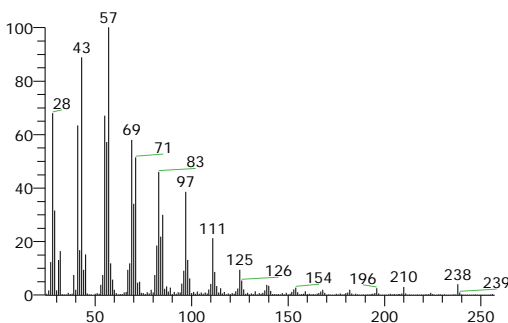

1-HEXADECANOL, 2-METHYL-  
Formula C17H36O, MW 256, CAS# 2490-48-4, Entry# 146911  
2-METHYLHEXADECAN-1-OL

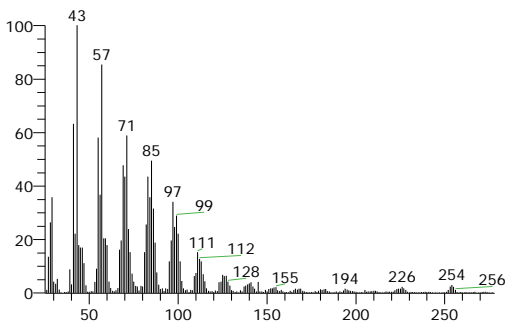

2,2,3,3,4,4 HEXADEUTERO OCTADECANAL  
Formula C18H30D6O, MW 274, CAS# 56554-51-9, Entry# 159360

| RT    | Compound Name             | Molecular Weight | Molecular Formula | Cas #      | Area % | Library         |
|-------|---------------------------|------------------|-------------------|------------|--------|-----------------|
| 16.57 | DOTRIACONTANE             | 450              | C32H66            | 544-85-4   | 0.19   | WileyRegistry8e |
| 16.57 | 14-á-H-PREGNA             | 288              | C21H36            | NA         | 0.19   | WileyRegistry8e |
| 16.57 | 2,2-DIDEUTERO OCTADECANAL | 270              | C18H34D2O         | 56555-07-8 | 0.19   | WileyRegistry8e |
| 16.57 | 1-HEXADECANOL, 2-METHYL-  | 256              | C17H36O           | 2490-48-4  | 0.19   | WileyRegistry8e |

# My GC-MS Report

Hit Spectrum

Compound Structure



**DOTRIACONTANE**  
 Formula C32H66, MW 450, CAS# 544-85-4, Entry# 274478  
 A13-52367

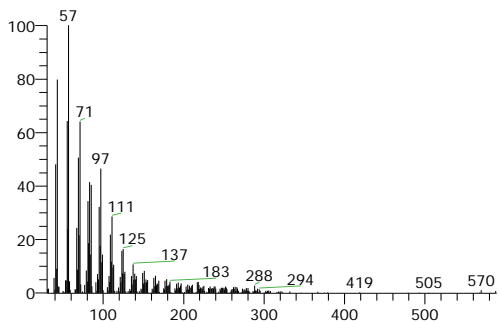

**14-á-H-PREGNA**  
 Formula C21H36, MW 288, CAS# NA, Entry# 178939  
 14-á-PREGNA

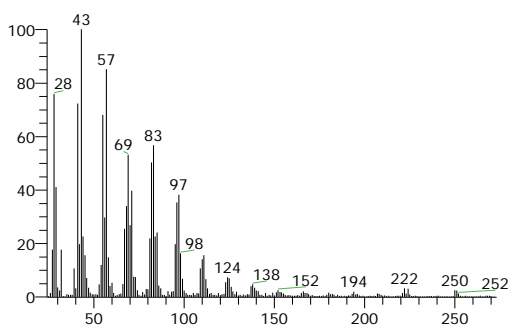

**2,2-DIDEUTERO OCTADECANAL**  
 Formula C18H34D2O, MW 270, CAS# 56555-07-8, Entry# 159359

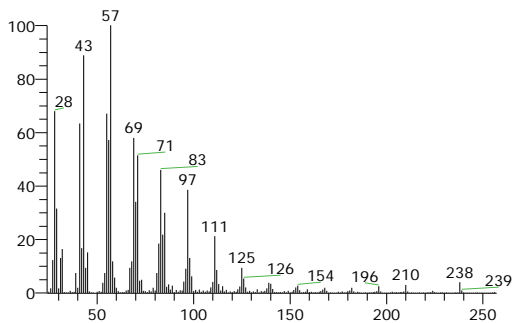

**1-HEXADECANOL, 2-METHYL-2-METHYLHEXADECAN-1-OL**  
 Formula C17H36O, MW 256, CAS# 2490-48-4, Entry# 146911

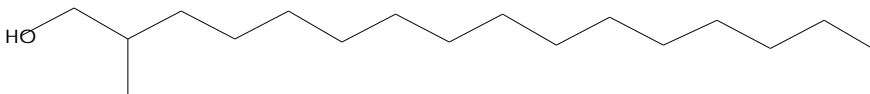

| RT    | Compound Name                       | Molecular Weight | Molecular Formula | Cas #      | Area % | Library         |
|-------|-------------------------------------|------------------|-------------------|------------|--------|-----------------|
| 16.89 | DOTRIACONTANE                       | 450              | C32H66            | 544-85-4   | 0.23   | WileyRegistry8e |
| 16.89 | 14-á-H-PREGNA                       | 288              | C21H36            | NA         | 0.23   | WileyRegistry8e |
| 16.89 | tert-Hexadecanethiol                | 258              | C16H34S           | 25360-09-2 | 0.23   | mainlib         |
| 16.89 | 2,2,3,3,4,4 HEXADEUTERO OCTADECANAL | 274              | C18H30D6O         | 56554-51-9 | 0.23   | WileyRegistry8e |

# My GC-MS Report

Hit Spectrum

Compound Structure



**DOTRIACONTANE**  
 Formula C32H66, MW 450, CAS# 544-85-4, Entry# 274478  
 A13-52367



**14-á-H-PREGNA**  
 Formula C21H36, MW 288, CAS# NA, Entry# 178939  
 14-á-PREGNA

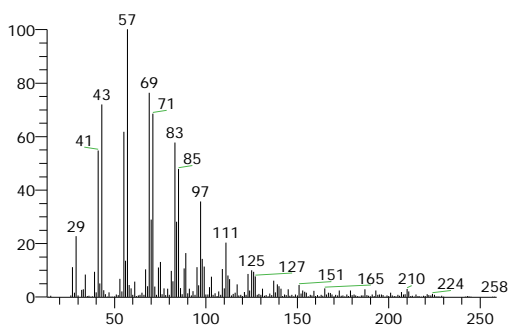

**tert-Hexadecanethiol**  
 Formula C16H34S, MW 258, CAS# 25360-09-2, Entry# 21483  
 1,1-Dimethyltetradecyl hydrosulfide #

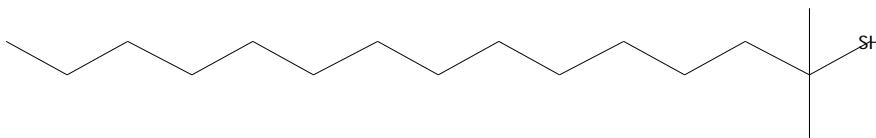

**2,2,3,3,4,4 HEXADEUTERO OCTADECANAL**  
 Formula C18H30D6O, MW 274, CAS# 56554-51-9, Entry# 159360

| RT    | Compound Name                       | Molecular Weight | Molecular Formula | Cas #      | Area % | Library         |
|-------|-------------------------------------|------------------|-------------------|------------|--------|-----------------|
| 17.28 | DOTRIACONTANE                       | 450              | C32H66            | 544-85-4   | 0.10   | WileyRegistry8e |
| 17.28 | 2,2-DIDEUTERO OCTADECANAL           | 270              | C18H34D2O         | 56555-07-8 | 0.10   | WileyRegistry8e |
| 17.28 | 14-á-H-PREGNA                       | 288              | C21H36            | NA         | 0.10   | WileyRegistry8e |
| 17.28 | 2,2,3,3,4,4 HEXADEUTERO OCTADECANAL | 274              | C18H30D6O         | 56554-51-9 | 0.10   | WileyRegistry8e |

# My GC-MS Report

Hit Spectrum

Compound Structure

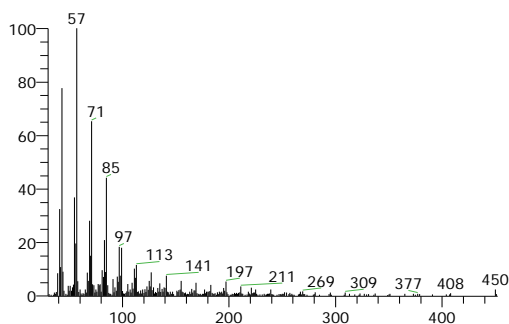

DOTRIACONTANE  
Formula C32H66, MW 450, CAS# 544-85-4, Entry# 274478  
A13-52367

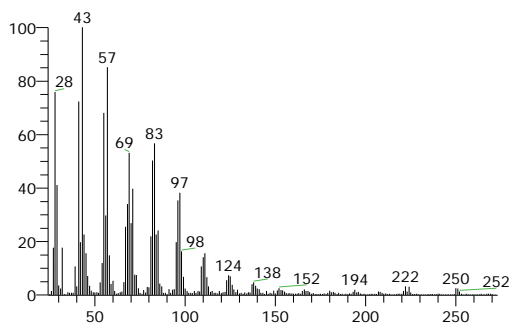

2,2-DIDEUTERO OCTADECANAL  
Formula C18H34D2O, MW 270, CAS# 56555-07-8, Entry# 159359

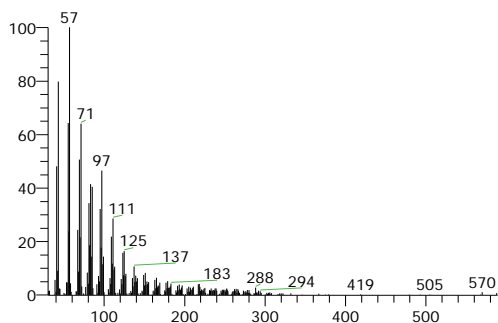

14-á-H-PREGNA  
Formula C21H36, MW 288, CAS# NA, Entry# 178939  
14-á-PREGNA

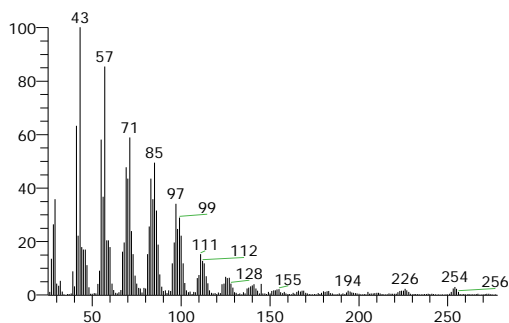

2,2,3,3,4,4 HEXADEUTERO OCTADECANAL  
Formula C18H30D6O, MW 274, CAS# 56554-51-9, Entry# 159360

| RT    | Compound Name             | Molecular Weight | Molecular Formula | Cas #      | Area % | Library         |
|-------|---------------------------|------------------|-------------------|------------|--------|-----------------|
| 17.34 | DOTRIACONTANE             | 450              | C32H66            | 544-85-4   | 0.13   | WileyRegistry8e |
| 17.34 | 2,2-DIDEUTERO OCTADECANAL | 270              | C18H34D2O         | 56555-07-8 | 0.13   | WileyRegistry8e |
| 17.34 | 14-á-H-PREGNA             | 288              | C21H36            | NA         | 0.13   | WileyRegistry8e |
| 17.34 | 1-Hexadecanol, 2-methyl-  | 256              | C17H36O           | 2490-48-4  | 0.13   | mainlib         |



# My GC-MS Report

Hit Spectrum

Compound Structure



DOTRIACONTANE  
Formula C32H66, MW 450, CAS# 544-85-4, Entry# 274478  
A13-52367

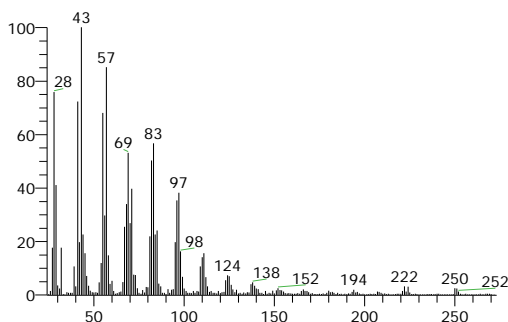

2,2-DIDEUTERO OCTADECANAL  
Formula C18H34D2O, MW 270, CAS# 56555-07-8, Entry# 159359

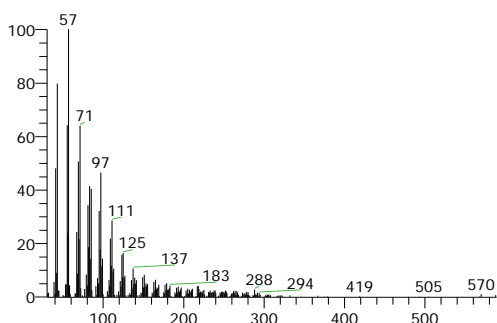

14-á-H-PREGNA  
Formula C21H36, MW 288, CAS# NA, Entry# 178939  
14-á-PREGNA

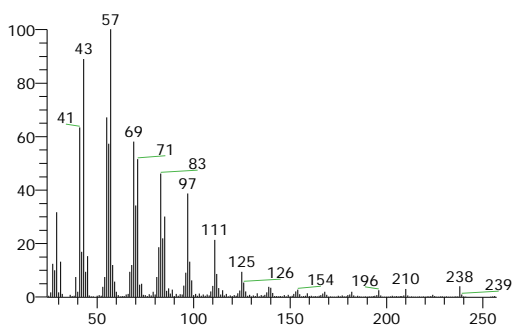

1-Hexadecanol, 2-methyl-  
Formula C17H36O, MW 256, CAS# 2490-48-4, Entry# 20717  
2-Methylhexadecan-1-ol

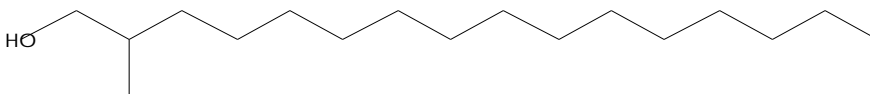

| RT    | Compound Name             | Molecular Weight | Molecular Formula | Cas #      | Area % | Library         |
|-------|---------------------------|------------------|-------------------|------------|--------|-----------------|
| 17.58 | DOTRIACONTANE             | 450              | C32H66            | 544-85-4   | 0.17   | WileyRegistry8e |
| 17.58 | 2,2-DIDEUTERO OCTADECANAL | 270              | C18H34D2O         | 56555-07-8 | 0.17   | WileyRegistry8e |
| 17.58 | 14-á-H-PREGNA             | 288              | C21H36            | NA         | 0.17   | WileyRegistry8e |
| 17.58 | 1-NONADECENE              | 266              | C19H38            | 18435-45-5 | 0.17   | WileyRegistry8e |

# My GC-MS Report

Hit Spectrum

Compound Structure



**DOTRIACONTANE**  
 Formula C32H66, MW 450, CAS# 544-85-4, Entry# 274478  
 AI3-52367



**2,2-DIDEUTERO OCTADECANAL**  
 Formula C18H34D2O, MW 270, CAS# 56555-07-8, Entry# 159359



**14-á-H-PREGNA**  
 Formula C21H36, MW 288, CAS# NA, Entry# 178939  
 14-á-PREGNA

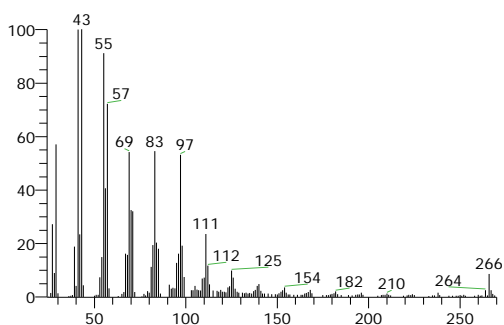

**1-NONADECENE**  
 Formula C19H38, MW 266, CAS# 18435-45-5, Entry# 157387  
 AI3-36475

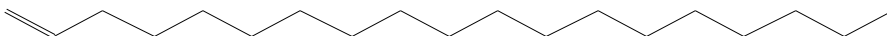

| RT    | Compound Name                       | Molecular Weight | Molecular Formula | Cas #      | Area % | Library         |
|-------|-------------------------------------|------------------|-------------------|------------|--------|-----------------|
| 17.67 | DOTRIACONTANE                       | 450              | C32H66            | 544-85-4   | 0.15   | WileyRegistry8e |
| 17.67 | 2,2-DIDEUTERO OCTADECANAL           | 270              | C18H34D2O         | 56555-07-8 | 0.15   | WileyRegistry8e |
| 17.67 | 14-á-H-PREGNA                       | 288              | C21H36            | NA         | 0.15   | WileyRegistry8e |
| 17.67 | 2,2,3,3,4,4 HEXADEUTERO OCTADECANAL | 274              | C18H30D6O         | 56554-51-9 | 0.15   | WileyRegistry8e |

# My GC-MS Report

Hit Spectrum

Compound Structure



**DOTRIACONTANE**  
 Formula C<sub>32</sub>H<sub>66</sub>, MW 450, CAS# 544-85-4, Entry# 274478  
 AI3-52367

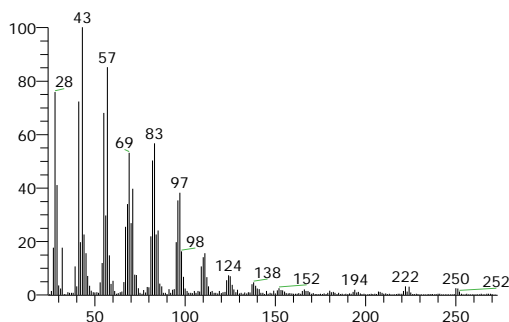

**2,2-DIDEUTERO OCTADECANAL**  
 Formula C<sub>18</sub>H<sub>34</sub>D<sub>2</sub>O, MW 270, CAS# 56555-07-8, Entry# 159359

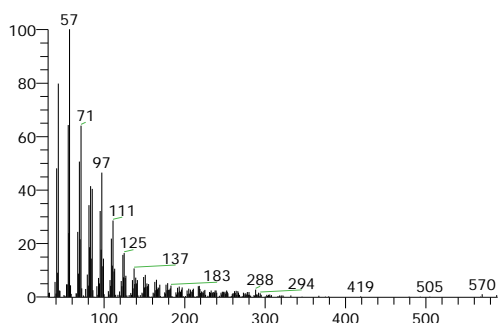

**14-á-H-PREGNA**  
 Formula C<sub>21</sub>H<sub>36</sub>, MW 288, CAS# NA, Entry# 178939  
 14-á-PREGNA

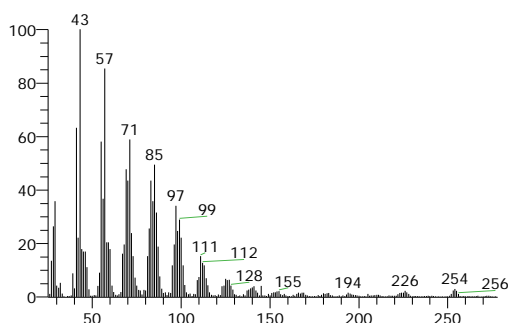

**2,2,3,3,4,4 HEXADEUTERO OCTADECANAL**  
 Formula C<sub>18</sub>H<sub>30</sub>D<sub>6</sub>O, MW 274, CAS# 56554-51-9, Entry# 159360

| RT    | Compound Name             | Molecular Weight | Molecular Formula                                | Cas #      | Area % | Library         |
|-------|---------------------------|------------------|--------------------------------------------------|------------|--------|-----------------|
| 17.97 | 2,2-DIDEUTERO OCTADECANAL | 270              | C <sub>18</sub> H <sub>34</sub> D <sub>2</sub> O | 56555-07-8 | 0.23   | WileyRegistry8e |
| 17.97 | 14-á-H-PREGNA             | 288              | C <sub>21</sub> H <sub>36</sub>                  | NA         | 0.23   | WileyRegistry8e |
| 17.97 | 1-HEXADECANOL, 2-METHYL-  | 256              | C <sub>17</sub> H <sub>36</sub> O                | 2490-48-4  | 0.23   | WileyRegistry8e |
| 17.97 | 1-NONADECENE              | 266              | C <sub>19</sub> H <sub>38</sub>                  | 18435-45-5 | 0.23   | WileyRegistry8e |

# My GC-MS Report

Hit Spectrum

Compound Structure



2,2-DIDEUTERO OCTADECANAL  
Formula C18H34D2O, MW 270, CAS# 56555-07-8, Entry# 159359

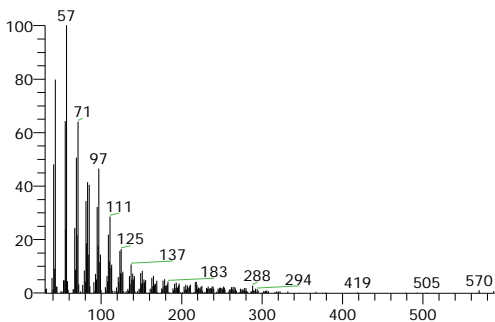

14-á-H-PREGNA  
Formula C21H36, MW 288, CAS# NA, Entry# 178939  
14-á-PREGNA

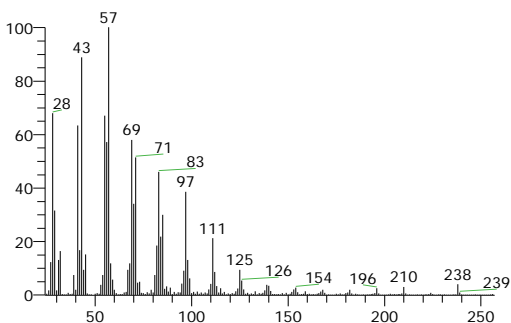

1-HEXADECANOL, 2-METHYL-  
2-METHYLHEXADECAN-1-OL  
Formula C17H36O, MW 256, CAS# 2490-48-4, Entry# 146911

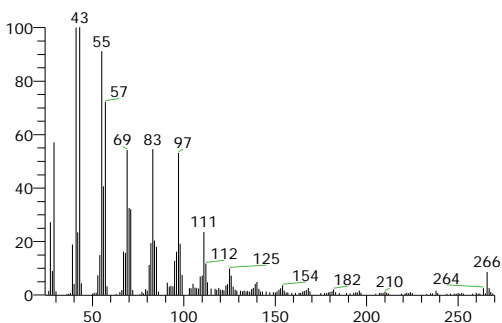

1-NONADECENE  
Formula C19H38, MW 266, CAS# 18435-45-5, Entry# 157387  
A13-36475

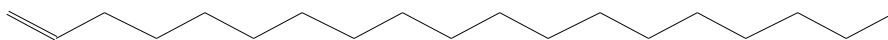

| RT    | Compound Name                      | Molecular Weight | Molecular Formula | Cas #      | Area % | Library         |
|-------|------------------------------------|------------------|-------------------|------------|--------|-----------------|
| 18.30 | 14-á-H-PREGNA                      | 288              | C21H36            | NA         | 0.40   | WileyRegistry8e |
| 18.30 | 01297107001 TETRANEURIN - A - DIOL | 280              | C15H20O5          | NA         | 0.40   | WileyRegistry8e |
| 18.30 | DOTRIACONTANE                      | 450              | C32H66            | 544-85-4   | 0.40   | WileyRegistry8e |
| 18.30 | 2,2-DIDEUTERO OCTADECANAL          | 270              | C18H34D2O         | 56555-07-8 | 0.40   | WileyRegistry8e |

# My GC-MS Report

Hit Spectrum

Compound Structure

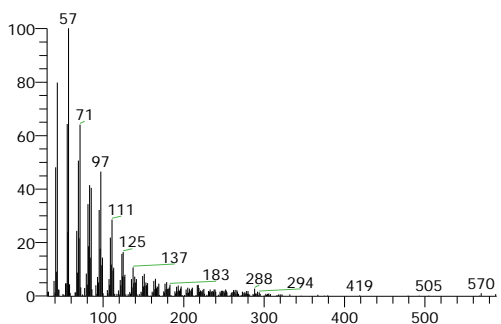

14- $\alpha$ -H-PREGNA  
Formula C<sub>21</sub>H<sub>36</sub>, MW 288, CAS# NA, Entry# 178939  
14- $\alpha$ -PREGNA

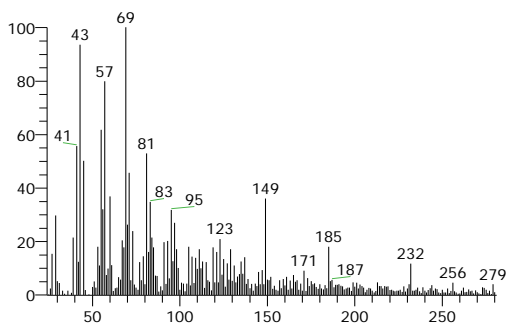

01297107001 TETRANEURIN - A - DIOL  
Formula C<sub>15</sub>H<sub>20</sub>O<sub>5</sub>, MW 280, CAS# NA, Entry# 170378

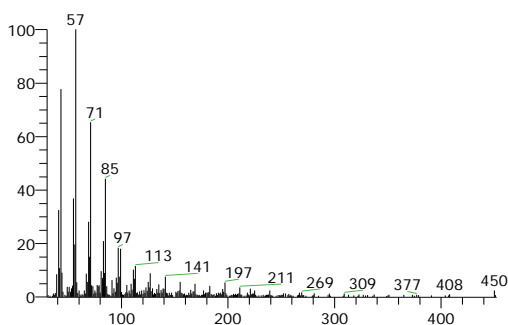

DOTRIACONTANE  
Formula C<sub>32</sub>H<sub>66</sub>, MW 450, CAS# 544-85-4, Entry# 274478  
A13-52367

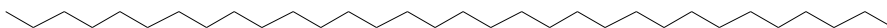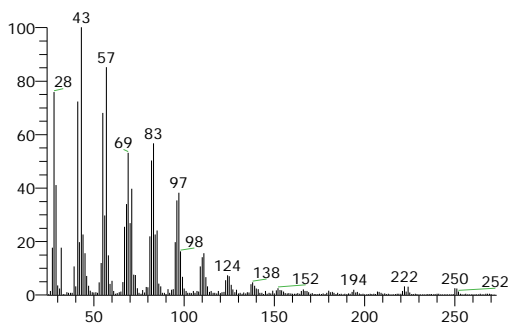

2,2-DIDEUTERO OCTADECANAL  
Formula C<sub>18</sub>H<sub>34</sub>D<sub>2</sub>O, MW 270, CAS# 56555-07-8, Entry# 159359

| RT    | Compound Name                                            | Molecular Weight | Molecular Formula                              | Cas #       | Area % | Library         |
|-------|----------------------------------------------------------|------------------|------------------------------------------------|-------------|--------|-----------------|
| 18.37 | 1-Heptatriacontanol                                      | 536              | C <sub>37</sub> H <sub>76</sub> O              | 105794-58-9 | 0.22   | mainlib         |
| 18.37 | HEXADECADIENOIC ACID, METHYL ESTER                       | 266              | C <sub>17</sub> H <sub>30</sub> O <sub>2</sub> | 29961-54-4  | 0.22   | WileyRegistry8e |
| 18.37 | 14- $\alpha$ -H-PREGNA                                   | 288              | C <sub>21</sub> H <sub>36</sub>                | NA          | 0.22   | WileyRegistry8e |
| 18.37 | Cholestan-3-ol, 2-methylene-, (3 $\alpha$ ,5 $\alpha$ )- | 400              | C <sub>28</sub> H <sub>48</sub> O              | 22599-96-8  | 0.22   | mainlib         |

# My GC-MS Report

Hit Spectrum

Compound Structure

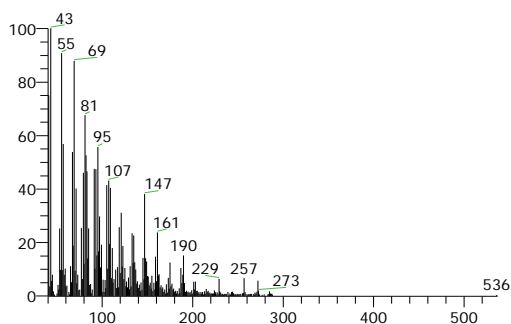

1-Heptatriacotanol  
Formula C37H76O, MW 536, CAS# 105794-58-9, Entry# 6567  
1-Heptatriacontanol #

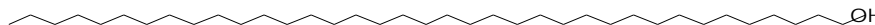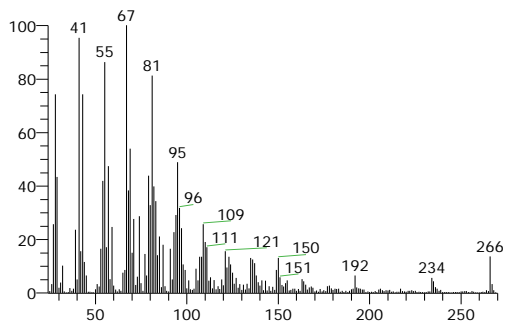

HEXADECADIENOIC ACID, METHYL ESTER  
Formula C17H30O2, MW 266, CAS# 29961-54-4, Entry# 157129  
METHYL HEXADECADIENOATE



14-á-H-PREGNA  
Formula C21H36, MW 288, CAS# NA, Entry# 178939  
14-á-PREGNA

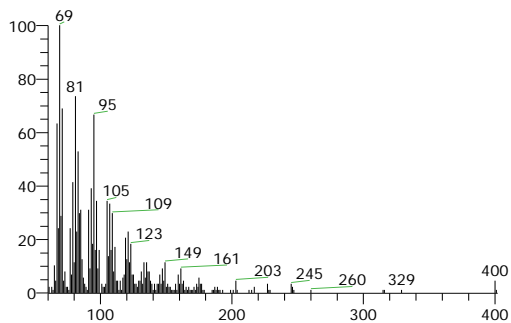

Cholestan-3-ol, 2-methylene-, (3á,5à)-  
Formula C28H48O, MW 400, CAS# 22599-96-8, Entry# 28998  
5à-Cholestan-3á-ol, 2-methylene-

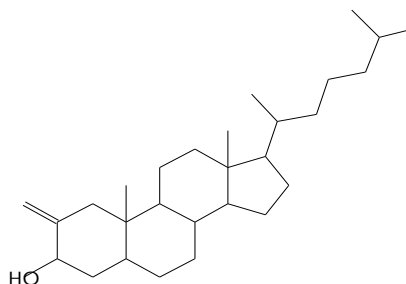

| RT    | Compound Name                          | Molecular Weight | Molecular Formula | Cas #       | Area % | Library         |
|-------|----------------------------------------|------------------|-------------------|-------------|--------|-----------------|
| 18.59 | Cholestan-3-ol, 2-methylene-, (3á,5à)- | 400              | C28H48O           | 22599-9     | 0.55   | mainlib         |
| 18.59 | CHOLESTAN-3-OL, 2-METHYLENE-, (3á,5à)- | 400              | C28H48O           | 22599-9     | 0.55   | WileyRegistry8e |
| 18.59 | 1-Heptatriacotanol                     | 536              | C37H76O           | 105794-58-9 | 0.55   | mainlib         |
| 18.59 | 14-á-H-PREGNA                          | 288              | C21H36            | NA          | 0.55   | WileyRegistry8e |

# My GC-MS Report

Hit Spectrum

Compound Structure

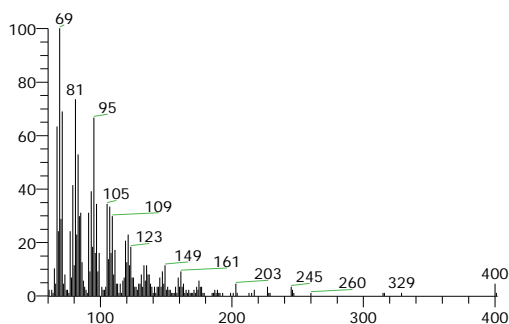

Cholestan-3-ol, 2-methylene-, (3 $\alpha$ ,5 $\alpha$ )-  
Formula C<sub>28</sub>H<sub>48</sub>O, MW 400, CAS# 22599-96-8, Entry# 28998  
5 $\alpha$ -Cholestan-3 $\alpha$ -ol, 2-methylene-

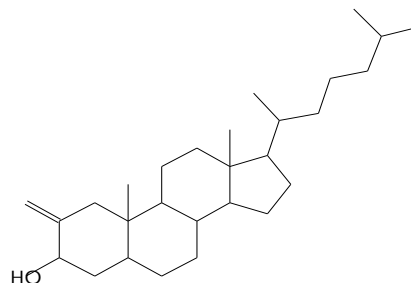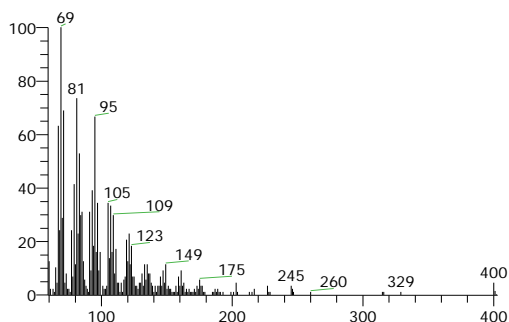

CHOLESTAN-3-OL, 2-METHYLENE-, (3 $\alpha$ ,5 $\alpha$ )-  
Formula C<sub>28</sub>H<sub>48</sub>O, MW 400, CAS# 22599-96-8, Entry# 256365  
2-METHYLENECHOLESTAN-3-OL #

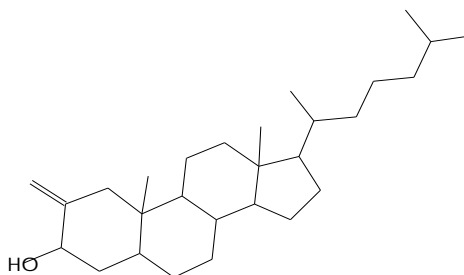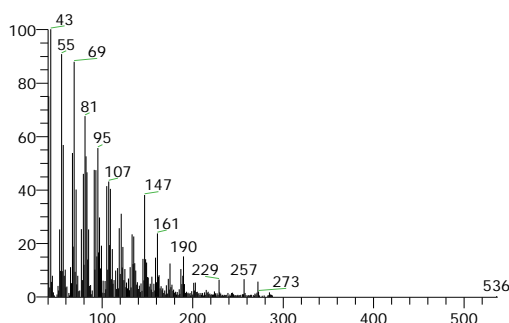

1-Heptatriacontanol  
Formula C<sub>37</sub>H<sub>76</sub>O, MW 536, CAS# 105794-58-9, Entry# 6567  
1-Heptatriacontanol #

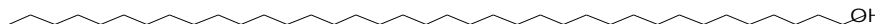

14- $\alpha$ -H-PREGNA  
Formula C<sub>21</sub>H<sub>36</sub>, MW 288, CAS# NA, Entry# 178939  
14- $\alpha$ -PREGNA

| RT    | Compound Name             | Molecular Weight | Molecular Formula                                | Cas #      | Area % | Library         |
|-------|---------------------------|------------------|--------------------------------------------------|------------|--------|-----------------|
| 19.22 | DOTRIACONTANE             | 450              | C <sub>32</sub> H <sub>66</sub>                  | 544-85-4   | 0.31   | WileyRegistry8e |
| 19.22 | 14- $\alpha$ -H-PREGNA    | 288              | C <sub>21</sub> H <sub>36</sub>                  | NA         | 0.31   | WileyRegistry8e |
| 19.22 | 14- $\alpha$ -H-PREGNA    | 288              | C <sub>21</sub> H <sub>36</sub>                  | NA         | 0.31   | WileyRegistry8e |
| 19.22 | 2,2-DIDEUTERO OCTADECANAL | 270              | C <sub>18</sub> H <sub>34</sub> D <sub>2</sub> O | 56555-07-8 | 0.31   | WileyRegistry8e |

# My GC-MS Report

Hit Spectrum

Compound Structure



DOTRIACONTANE  
Formula C32H66, MW 450, CAS# 544-85-4, Entry# 274478  
AI3-52367

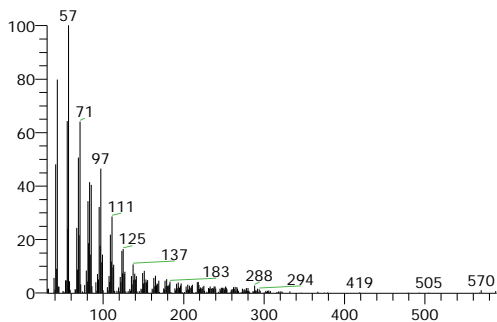

14-á-H-PREGNA  
Formula C21H36, MW 288, CAS# NA, Entry# 178939  
14-á-PREGNA

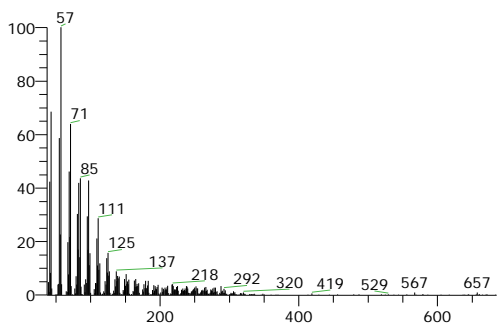

14-á-H-PREGNA  
Formula C21H36, MW 288, CAS# NA, Entry# 178938  
14-á-PREGNA

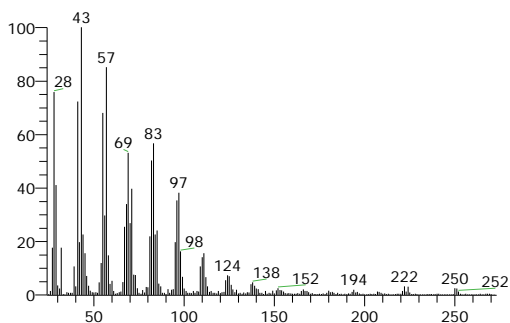

2,2-DIDEUTERO OCTADECANAL  
Formula C18H34D2O, MW 270, CAS# 56555-07-8, Entry# 159359

| RT    | Compound Name             | Molecular Weight | Molecular Formula | Cas #      | Area % | Library         |
|-------|---------------------------|------------------|-------------------|------------|--------|-----------------|
| 19.46 | DOTRIACONTANE             | 450              | C32H66            | 544-85-4   | 0.91   | WileyRegistry8e |
| 19.46 | 14-á-H-PREGNA             | 288              | C21H36            | NA         | 0.91   | WileyRegistry8e |
| 19.46 | 2,2-DIDEUTERO OCTADECANAL | 270              | C18H34D2O         | 56555-07-8 | 0.91   | WileyRegistry8e |
| 19.46 | 1-HEXADECANOL, 2-METHYL-  | 256              | C17H36O           | 2490-48-4  | 0.91   | WileyRegistry8e |



# My GC-MS Report

Hit Spectrum

Compound Structure



DOTRIACONTANE  
Formula C<sub>32</sub>H<sub>66</sub>, MW 450, CAS# 544-85-4, Entry# 274478  
A13-52367



14-á-H-PREGNA  
Formula C<sub>21</sub>H<sub>36</sub>, MW 288, CAS# NA, Entry# 178939  
14-á-PREGNA



2,2-DIDEUTERO OCTADECANAL  
Formula C<sub>18</sub>H<sub>34</sub>D<sub>2</sub>O, MW 270, CAS# 56555-07-8, Entry# 159359



1-HEXADECANOL, 2-METHYL-  
2-METHYLHEXADECAN-1-OL  
Formula C<sub>17</sub>H<sub>36</sub>O, MW 256, CAS# 2490-48-4, Entry# 146911

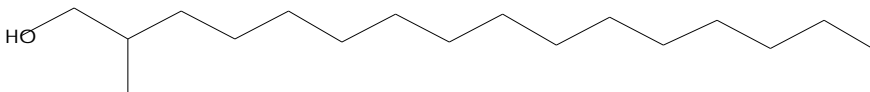

| RT    | Compound Name             | Molecular Weight | Molecular Formula                                | Cas #      | Area % | Library         |
|-------|---------------------------|------------------|--------------------------------------------------|------------|--------|-----------------|
| 19.70 | 2,2-DIDEUTERO OCTADECANAL | 270              | C <sub>18</sub> H <sub>34</sub> D <sub>2</sub> O | 56555-07-8 | 0.49   | WileyRegistry8e |
| 19.70 | 1-HEXADECANOL, 2-METHYL-  | 256              | C <sub>17</sub> H <sub>36</sub> O                | 2490-48-4  | 0.49   | WileyRegistry8e |
| 19.70 | 1-Hexadecanol, 2-methyl-  | 256              | C <sub>17</sub> H <sub>36</sub> O                | 2490-48-4  | 0.49   | mainlib         |
| 19.70 | DOTRIACONTANE             | 450              | C <sub>32</sub> H <sub>66</sub>                  | 544-85-4   | 0.49   | WileyRegistry8e |

# My GC-MS Report

Hit Spectrum

Compound Structure



2,2-DIDEUTERO OCTADECANAL  
Formula C18H34D2O, MW 270, CAS# 56555-07-8, Entry# 159359

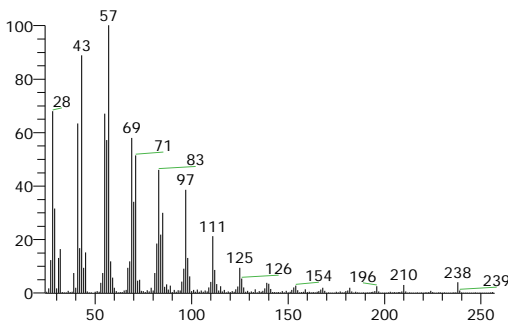

1-HEXADECANOL, 2-METHYL-  
2-METHYLHEXADECAN-1-OL  
Formula C17H36O, MW 256, CAS# 2490-48-4, Entry# 146911

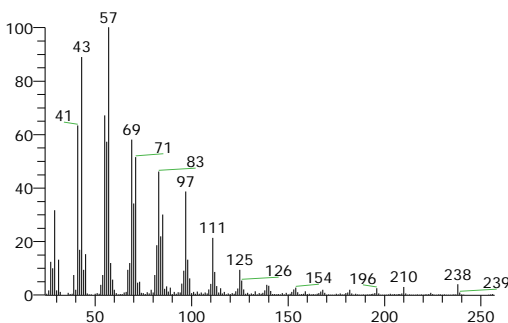

1-Hexadecanol, 2-methyl-  
2-Methylhexadecan-1-ol  
Formula C17H36O, MW 256, CAS# 2490-48-4, Entry# 20717

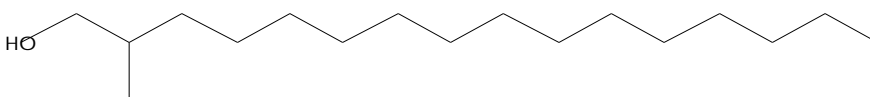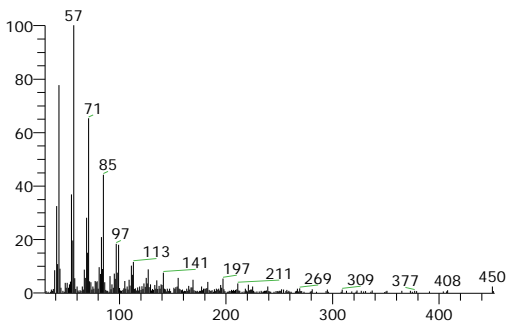

DOTRIACONTANE  
Formula C32H66, MW 450, CAS# 544-85-4, Entry# 274478  
A13-52367

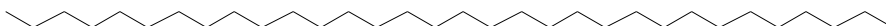

| RT    | Compound Name            | Molecular Weight | Molecular Formula | Cas #     | Area % | Library         |
|-------|--------------------------|------------------|-------------------|-----------|--------|-----------------|
| 20.37 | 14-á-H-PREGNA            | 288              | C21H36            | NA        | 0.09   | WileyRegistry8e |
| 20.37 | DOTRIACONTANE            | 450              | C32H66            | 544-85-4  | 0.09   | WileyRegistry8e |
| 20.37 | 1-Hexadecanol, 2-methyl- | 256              | C17H36O           | 2490-48-4 | 0.09   | mainlib         |
| 20.37 | 1-HEXADECANOL, 2-METHYL- | 256              | C17H36O           | 2490-48-4 | 0.09   | WileyRegistry8e |

# My GC-MS Report

Hit Spectrum

Compound Structure



14- $\alpha$ -H-PREGNA  
Formula C21H36, MW 288, CAS# NA, Entry# 178939  
14- $\alpha$ -PREGNA

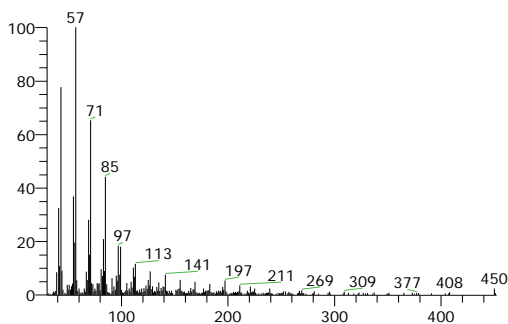

DOTRIACONTANE  
Formula C32H66, MW 450, CAS# 544-85-4, Entry# 274478  
AI3-52367



1-Hexadecanol, 2-methyl-  
Formula C17H36O, MW 256, CAS# 2490-48-4, Entry# 20717  
2-Methylhexadecan-1-ol

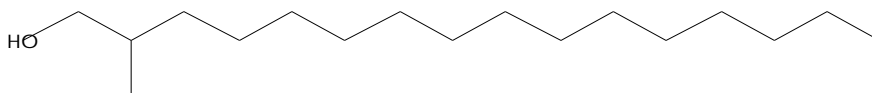

1-HEXADECANOL, 2-METHYL-  
Formula C17H36O, MW 256, CAS# 2490-48-4, Entry# 146911  
2-METHYLHEXADECAN-1-OL

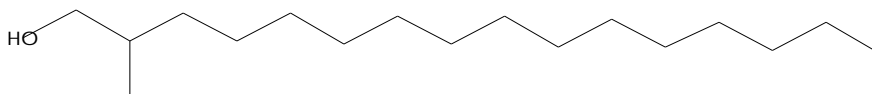

| RT    | Compound Name            | Molecular Weight | Molecular Formula | Cas #     | Area % | Library         |
|-------|--------------------------|------------------|-------------------|-----------|--------|-----------------|
| 20.57 | DOTRIACONTANE            | 450              | C32H66            | 544-85-4  | 1.20   | WileyRegistry8e |
| 20.57 | 1-CHLOROOCSTADECANE      | 288              | C18H37Cl          | 3386-33-2 | 1.20   | WileyRegistry8e |
| 20.57 | DOCOSANE                 | 310              | C22H46            | 629-97-0  | 1.20   | WileyRegistry8e |
| 20.57 | 1-HEXADECANOL, 2-METHYL- | 256              | C17H36O           | 2490-48-4 | 1.20   | WileyRegistry8e |

# My GC-MS Report

Hit Spectrum

Compound Structure



**DOTRIACONTANE**  
 Formula C<sub>32</sub>H<sub>66</sub>, MW 450, CAS# 544-85-4, Entry# 274478  
 A13-52367

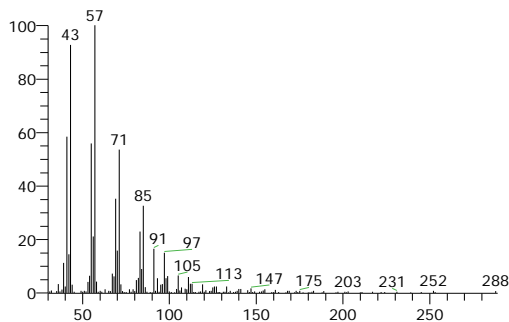

**1-CHLOROOCCTADECANE**  
 Formula C<sub>18</sub>H<sub>37</sub>Cl, MW 288, CAS# 3386-33-2, Entry# 359171  
 1-CHLOROOCCTADECAN

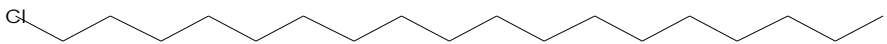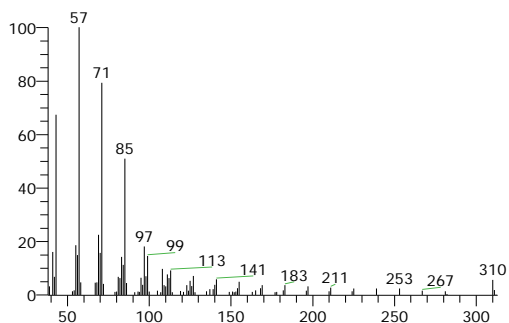

**DOCOSANE**  
 Formula C<sub>22</sub>H<sub>46</sub>, MW 310, CAS# 629-97-0, Entry# 198706  
 C22H46 STANDARD

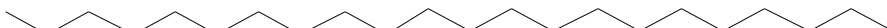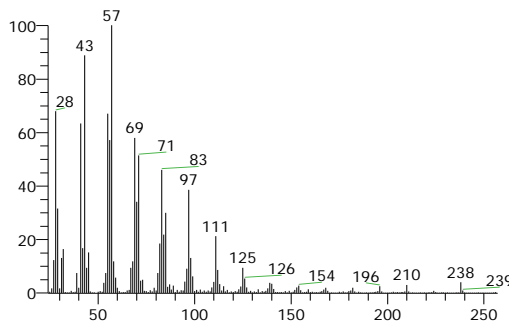

**1-HEXADECANOL, 2-METHYL-**  
 Formula C<sub>17</sub>H<sub>36</sub>O, MW 256, CAS# 2490-48-4, Entry# 146911  
 2-METHYLHEXADECAN-1-OL

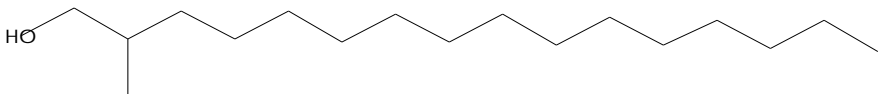

| RT    | Compound Name            | Molecular Weight | Molecular Formula                  | Cas #     | Area % | Library         |
|-------|--------------------------|------------------|------------------------------------|-----------|--------|-----------------|
| 20.80 | DOCOSANE                 | 310              | C <sub>22</sub> H <sub>46</sub>    | 629-97-0  | 1.57   | WileyRegistry8e |
| 20.80 | 1-CHLOROOCCTADECANE      | 288              | C <sub>18</sub> H <sub>37</sub> Cl | 3386-33-2 | 1.57   | WileyRegistry8e |
| 20.80 | 1-Hexadecanol, 2-methyl- | 256              | C <sub>17</sub> H <sub>36</sub> O  | 2490-48-4 | 1.57   | mainlib         |
| 20.80 | HENEICOSANE              | 296              | C <sub>21</sub> H <sub>44</sub>    | 629-94-7  | 1.57   | WileyRegistry8e |

# My GC-MS Report

Hit Spectrum

Compound Structure

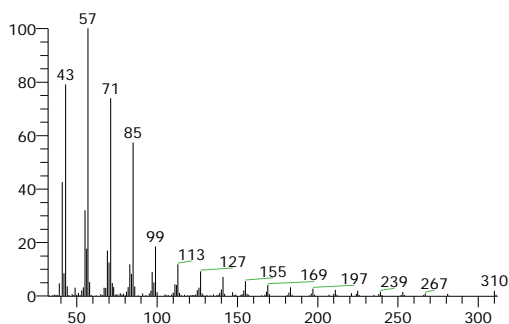

DOCOSANE  
Formula C<sub>22</sub>H<sub>46</sub>, MW 310, CAS# 629-97-0, Entry# 198707  
C<sub>22</sub>H<sub>46</sub> STANDARD

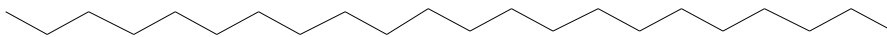

1-CHLOROOCOTADECANE  
Formula C<sub>18</sub>H<sub>37</sub>Cl, MW 288, CAS# 3386-33-2, Entry# 359171  
1-CHLOROOCOTADECAN

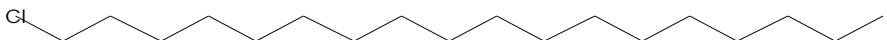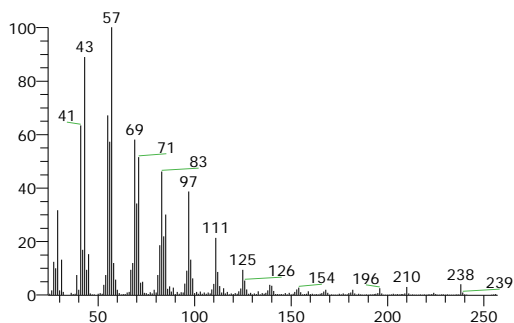

1-Hexadecanol, 2-methyl-  
Formula C<sub>17</sub>H<sub>36</sub>O, MW 256, CAS# 2490-48-4, Entry# 20717  
2-Methylhexadecan-1-ol

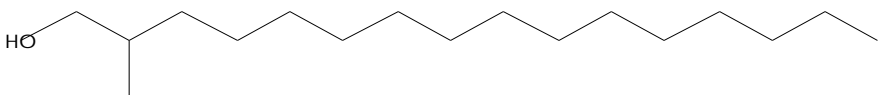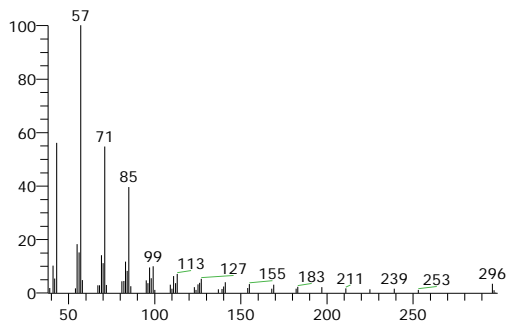

HENEICOSANE  
Formula C<sub>21</sub>H<sub>44</sub>, MW 296, CAS# 629-94-7, Entry# 186361  
HENICOSANE

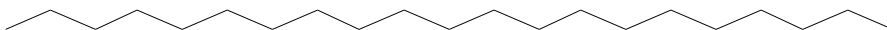

| RT    | Compound Name       | Molecular Weight | Molecular Formula                  | Cas #      | Area % | Library         |
|-------|---------------------|------------------|------------------------------------|------------|--------|-----------------|
| 21.00 | DOTRIACONTANE       | 450              | C <sub>32</sub> H <sub>66</sub>    | 544-85-4   | 1.86   | WileyRegistry8e |
| 21.00 | 1-CHLOROOCOTADECANE | 288              | C <sub>18</sub> H <sub>37</sub> Cl | 3386-33-2  | 1.86   | WileyRegistry8e |
| 21.00 | 14-á-H-PREGNA       | 288              | C <sub>21</sub> H <sub>36</sub>    | NA         | 1.86   | WileyRegistry8e |
| 21.00 | 1-Chloroeicosane    | 316              | C <sub>20</sub> H <sub>41</sub> Cl | 42217-02-7 | 1.86   | mainlib         |

# My GC-MS Report

Hit Spectrum

Compound Structure



**DOTRIACONTANE**  
 Formula C32H66, MW 450, CAS# 544-85-4, Entry# 274478  
 A13-52367

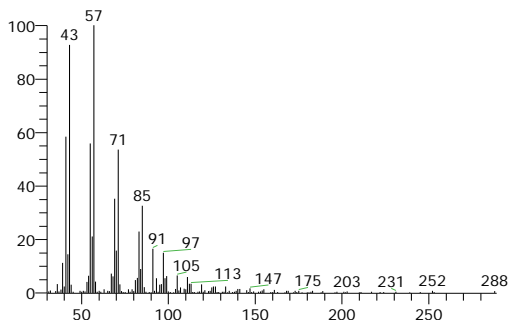

**1-CHLOROOCCTADECANE**  
 Formula C18H37Cl, MW 288, CAS# 3386-33-2, Entry# 359171  
 1-CHLOROOCCTADECAN

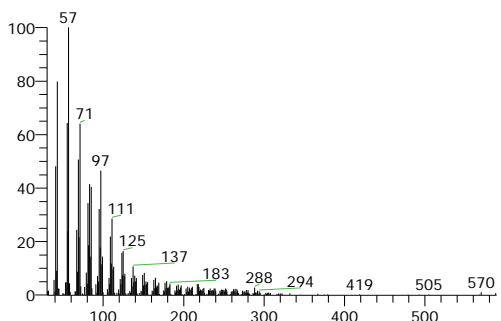

**14-á-H-PREGNA**  
 Formula C21H36, MW 288, CAS# NA, Entry# 178939  
 14-á-PREGNA

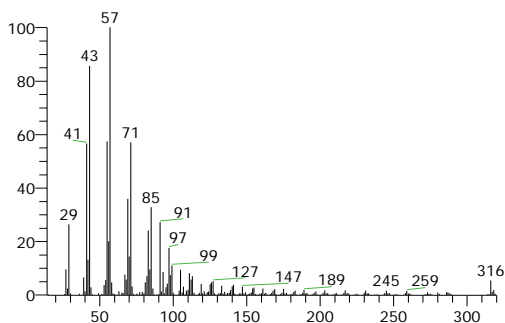

**1-Chloroeicosane**  
 Formula C20H41Cl, MW 316, CAS# 42217-02-7, Entry# 20712  
 Eicosane, 1-chloro-

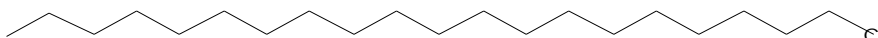

| RT    | Compound Name             | Molecular Weight | Molecular Formula | Cas #      | Area % | Library         |
|-------|---------------------------|------------------|-------------------|------------|--------|-----------------|
| 21.30 | 14-á-H-PREGNA             | 288              | C21H36            | NA         | 0.64   | WileyRegistry8e |
| 21.30 | DOTRIACONTANE             | 450              | C32H66            | 544-85-4   | 0.64   | WileyRegistry8e |
| 21.30 | 14-á-H-PREGNA             | 288              | C21H36            | NA         | 0.64   | WileyRegistry8e |
| 21.30 | 2,2-DIDEUTERO OCTADECANAL | 270              | C18H34D2O         | 56555-07-8 | 0.64   | WileyRegistry8e |

# My GC-MS Report

Hit Spectrum

Compound Structure



14- $\alpha$ -H-PREGNA  
Formula C21H36, MW 288, CAS# NA, Entry# 178939  
14- $\alpha$ -PREGNA



DOTRIACONTANE  
Formula C32H66, MW 450, CAS# 544-85-4, Entry# 274478  
A13-52367

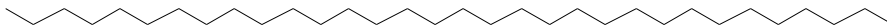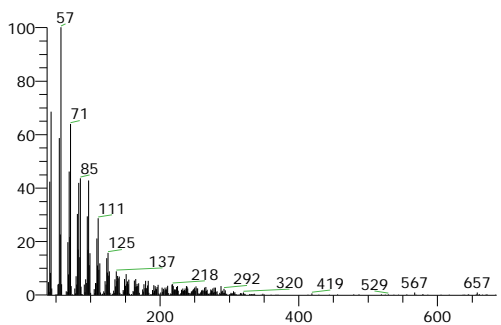

14- $\alpha$ -H-PREGNA  
Formula C21H36, MW 288, CAS# NA, Entry# 178938  
14- $\alpha$ -PREGNA

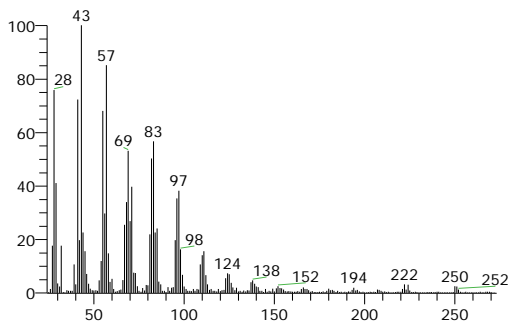

2,2-DIDEUTERO OCTADECANAL  
Formula C18H34D2O, MW 270, CAS# 56555-07-8, Entry# 159359

| RT    | Compound Name             | Molecular Weight | Molecular Formula | Cas #      | Area % | Library         |
|-------|---------------------------|------------------|-------------------|------------|--------|-----------------|
| 21.41 | 14- $\alpha$ -H-PREGNA    | 288              | C21H36            | NA         | 0.10   | WileyRegistry8e |
| 21.41 | DOTRIACONTANE             | 450              | C32H66            | 544-85-4   | 0.10   | WileyRegistry8e |
| 21.41 | 14- $\alpha$ -H-PREGNA    | 288              | C21H36            | NA         | 0.10   | WileyRegistry8e |
| 21.41 | 2,2-DIDEUTERO OCTADECANAL | 270              | C18H34D2O         | 56555-07-8 | 0.10   | WileyRegistry8e |

# My GC-MS Report

Hit Spectrum

Compound Structure



14-á-H-PREGNA  
Formula C21H36, MW 288, CAS# NA, Entry# 178939  
14-á-PREGNA

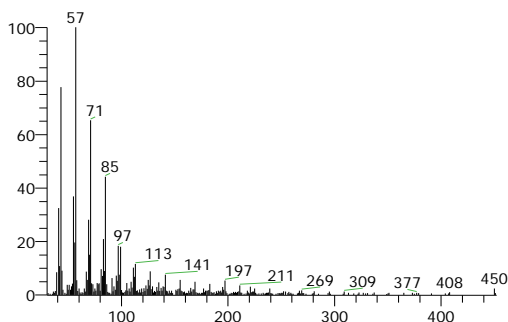

DOTRIACONTANE  
Formula C32H66, MW 450, CAS# 544-85-4, Entry# 274478  
AI3-52367

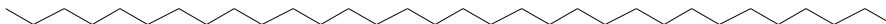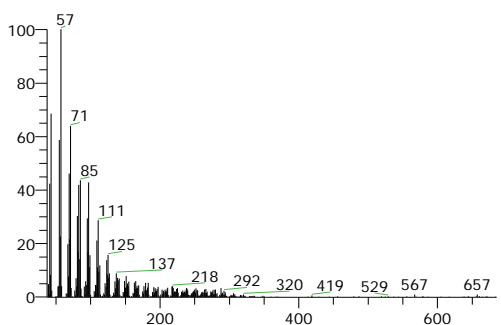

14-á-H-PREGNA  
Formula C21H36, MW 288, CAS# NA, Entry# 178938  
14-á-PREGNA



2,2-DIDEUTERO OCTADECANAL  
Formula C18H34D2O, MW 270, CAS# 56555-07-8, Entry# 159359

| RT    | Compound Name             | Molecular Weight | Molecular Formula | Cas #      | Area % | Library         |
|-------|---------------------------|------------------|-------------------|------------|--------|-----------------|
| 21.78 | 14-á-H-PREGNA             | 288              | C21H36            | NA         | 2.24   | WileyRegistry8e |
| 21.78 | DOTRIACONTANE             | 450              | C32H66            | 544-85-4   | 2.24   | WileyRegistry8e |
| 21.78 | 14-á-H-PREGNA             | 288              | C21H36            | NA         | 2.24   | WileyRegistry8e |
| 21.78 | 2,2-DIDEUTERO OCTADECANAL | 270              | C18H34D2O         | 56555-07-8 | 2.24   | WileyRegistry8e |



# My GC-MS Report

Hit Spectrum

Compound Structure



14-á-H-PREGNA  
Formula C21H36, MW 288, CAS# NA, Entry# 178939  
14-á-PREGNA



DOTRIACONTANE  
Formula C32H66, MW 450, CAS# 544-85-4, Entry# 274478  
AI3-52367



14-á-H-PREGNA  
Formula C21H36, MW 288, CAS# NA, Entry# 178938  
14-á-PREGNA



2,2-DIDEUTERO OCTADECANAL  
Formula C18H34D2O, MW 270, CAS# 56555-07-8, Entry# 159359

| RT    | Compound Name            | Molecular Weight | Molecular Formula | Cas #     | Area % | Library         |
|-------|--------------------------|------------------|-------------------|-----------|--------|-----------------|
| 21.90 | DOTRIACONTANE            | 450              | C32H66            | 544-85-4  | 1.86   | WileyRegistry8e |
| 21.90 | 14-á-H-PREGNA            | 288              | C21H36            | NA        | 1.86   | WileyRegistry8e |
| 21.90 | 1-Hexadecanol, 2-methyl- | 256              | C17H36O           | 2490-48-4 | 1.86   | mainlib         |
| 21.90 | 1-HEXADECANOL, 2-METHYL- | 256              | C17H36O           | 2490-48-4 | 1.86   | WileyRegistry8e |

# My GC-MS Report

Hit Spectrum

Compound Structure



DOTRIACONTANE  
Formula C<sub>32</sub>H<sub>66</sub>, MW 450, CAS# 544-85-4, Entry# 274478  
AI3-52367

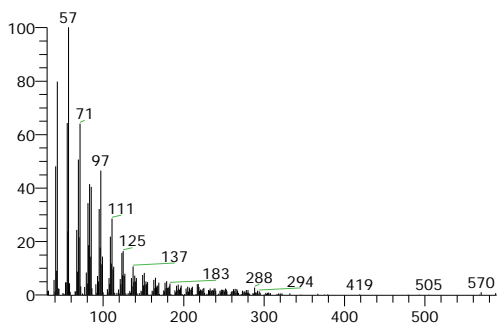

14-á-H-PREGNA  
Formula C<sub>21</sub>H<sub>36</sub>, MW 288, CAS# NA, Entry# 178939  
14-á-PREGNA



1-Hexadecanol, 2-methyl-  
Formula C<sub>17</sub>H<sub>36</sub>O, MW 256, CAS# 2490-48-4, Entry# 20717  
2-Methylhexadecan-1-ol

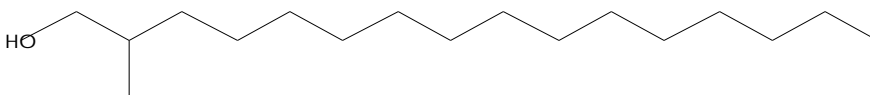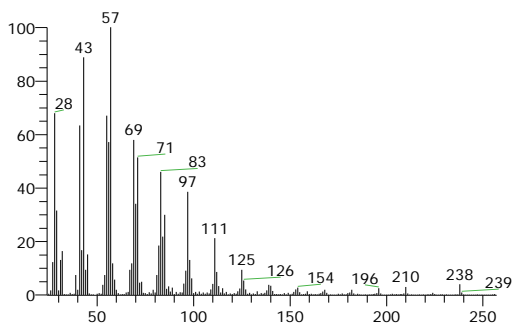

1-HEXADECANOL, 2-METHYL-  
Formula C<sub>17</sub>H<sub>36</sub>O, MW 256, CAS# 2490-48-4, Entry# 146911  
2-METHYLHEXADECAN-1-OL

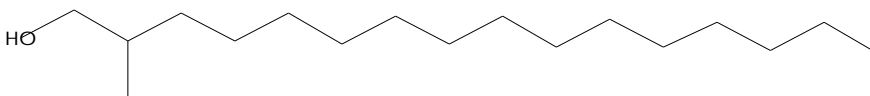

| RT    | Compound Name                       | Molecular Weight | Molecular Formula                                | Cas #       | Area % | Library         |
|-------|-------------------------------------|------------------|--------------------------------------------------|-------------|--------|-----------------|
| 22.29 | 2,2-DIDEUTERO OCTADECANAL           | 270              | C <sub>18</sub> H <sub>34</sub> D <sub>2</sub> O | 56555-0-7-8 | 0.15   | WileyRegistry8e |
| 22.29 | 14-á-H-PREGNA                       | 288              | C <sub>21</sub> H <sub>36</sub>                  | NA          | 0.15   | WileyRegistry8e |
| 22.29 | 14-á-H-PREGNA                       | 288              | C <sub>21</sub> H <sub>36</sub>                  | NA          | 0.15   | WileyRegistry8e |
| 22.29 | 2-Dodecen-1-yl(-)succinic anhydride | 266              | C <sub>16</sub> H <sub>26</sub> O <sub>3</sub>   | 19780-1-1-1 | 0.15   | mainlib         |

# My GC-MS Report

Hit Spectrum

Compound Structure



2,2-DIDEUTERO OCTADECANAL  
Formula C18H34D2O, MW 270, CAS# 56555-07-8, Entry# 159359

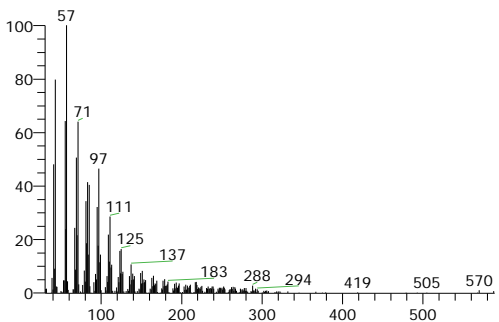

14-á-H-PREGNA  
Formula C21H36, MW 288, CAS# NA, Entry# 178939  
14-á-PREGNA

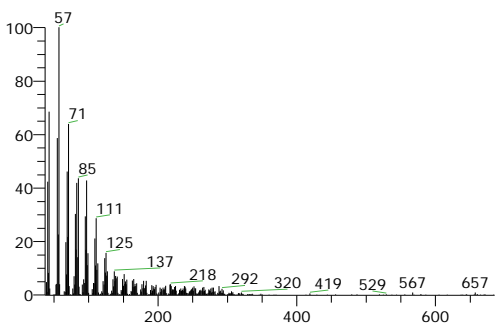

14-á-H-PREGNA  
Formula C21H36, MW 288, CAS# NA, Entry# 178938  
14-á-PREGNA

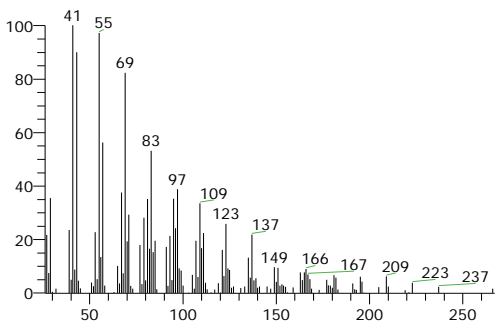

2-Dodecen-1-yl(-)succinic anhydride  
Formula C16H26O3, MW 266, CAS# 19780-11-1, Entry# 2388  
2,5-Furandione, 3-dodeceny-

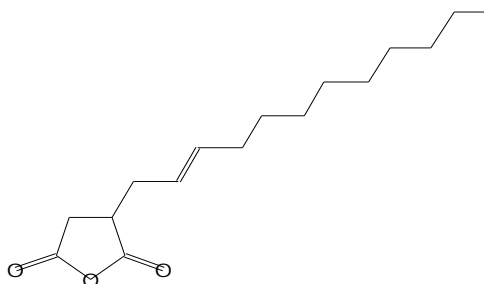

| RT    | Compound Name             | Molecular Weight | Molecular Formula | Cas #      | Area % | Library         |
|-------|---------------------------|------------------|-------------------|------------|--------|-----------------|
| 22.46 | 2,2-DIDEUTERO OCTADECANAL | 270              | C18H34D2O         | 56555-07-8 | 1.22   | WileyRegistry8e |
| 22.46 | 14-á-H-PREGNA             | 288              | C21H36            | NA         | 1.22   | WileyRegistry8e |
| 22.46 | DOTRIACONTANE             | 450              | C32H66            | 544-85-4   | 1.22   | WileyRegistry8e |
| 22.46 | 14-á-H-PREGNA             | 288              | C21H36            | NA         | 1.22   | WileyRegistry8e |

# My GC-MS Report

Hit Spectrum

Compound Structure



2,2-DIDEUTERO OCTADECANAL  
Formula C18H34D2O, MW 270, CAS# 56555-07-8, Entry# 159359

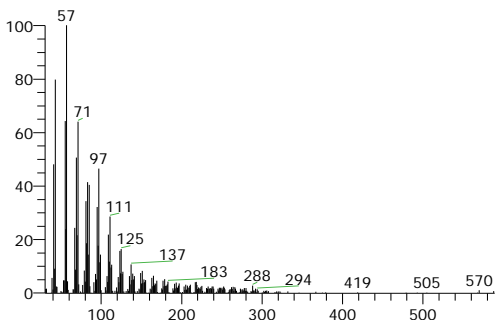

14-á-H-PREGNA  
Formula C21H36, MW 288, CAS# NA, Entry# 178939  
14-á-PREGNA

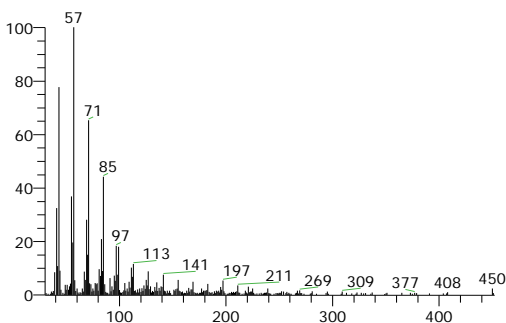

DOTRIACONTANE  
Formula C32H66, MW 450, CAS# 544-85-4, Entry# 274478  
AI3-52367

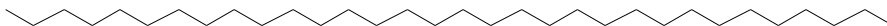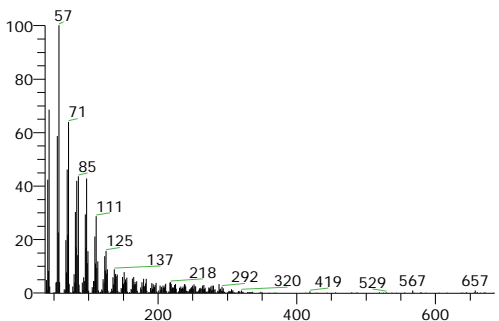

14-á-H-PREGNA  
Formula C21H36, MW 288, CAS# NA, Entry# 178938  
14-á-PREGNA

| RT    | Compound Name            | Molecular Weight | Molecular Formula | Cas #     | Area % | Library         |
|-------|--------------------------|------------------|-------------------|-----------|--------|-----------------|
| 22.65 | DOTRIACONTANE            | 450              | C32H66            | 544-85-4  | 2.23   | WileyRegistry8e |
| 22.65 | 14-á-H-PREGNA            | 288              | C21H36            | NA        | 2.23   | WileyRegistry8e |
| 22.65 | 1-Hexadecanol, 2-methyl- | 256              | C17H36O           | 2490-48-4 | 2.23   | mainlib         |
| 22.65 | 1-HEXADECANOL, 2-METHYL- | 256              | C17H36O           | 2490-48-4 | 2.23   | WileyRegistry8e |

# My GC-MS Report

Hit Spectrum

Compound Structure



DOTRIACONTANE  
Formula C32H66, MW 450, CAS# 544-85-4, Entry# 274478  
AI3-52367

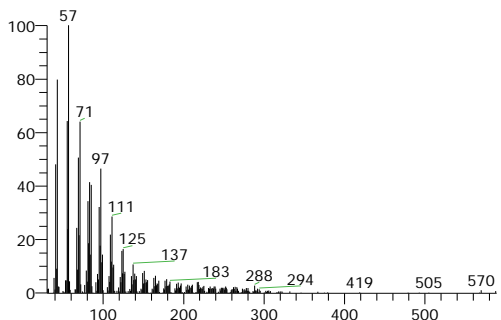

14-á-H-PREGNA  
Formula C21H36, MW 288, CAS# NA, Entry# 178939  
14-á-PREGNA



1-Hexadecanol, 2-methyl-  
Formula C17H36O, MW 256, CAS# 2490-48-4, Entry# 20717  
2-Methylhexadecan-1-ol



1-HEXADECANOL, 2-METHYL-  
Formula C17H36O, MW 256, CAS# 2490-48-4, Entry# 146911  
2-METHYLHEXADECAN-1-OL



| RT    | Compound Name             | Molecular Weight | Molecular Formula | Cas #      | Area % | Library         |
|-------|---------------------------|------------------|-------------------|------------|--------|-----------------|
| 22.78 | DOTRIACONTANE             | 450              | C32H66            | 544-85-4   | 0.28   | WileyRegistry8e |
| 22.78 | 14-á-H-PREGNA             | 288              | C21H36            | NA         | 0.28   | WileyRegistry8e |
| 22.78 | 2,2-DIDEUTERO OCTADECANAL | 270              | C18H34D2O         | 56555-07-8 | 0.28   | WileyRegistry8e |
| 22.78 | 1-Hexadecanol, 2-methyl-  | 256              | C17H36O           | 2490-48-4  | 0.28   | mainlib         |

# My GC-MS Report

Hit Spectrum

Compound Structure



DOTRIACONTANE  
Formula C32H66, MW 450, CAS# 544-85-4, Entry# 274478  
A13-52367



14-á-H-PREGNA  
Formula C21H36, MW 288, CAS# NA, Entry# 178939  
14-á-PREGNA

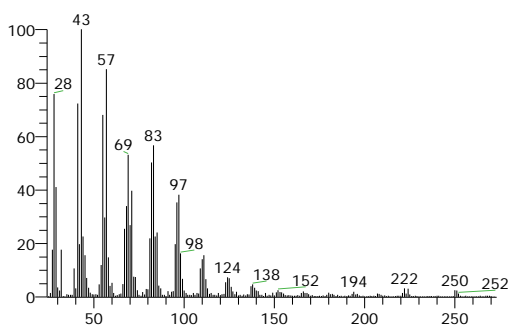

2,2-DIDEUTERO OCTADECANAL  
Formula C18H34D2O, MW 270, CAS# 56555-07-8, Entry# 159359

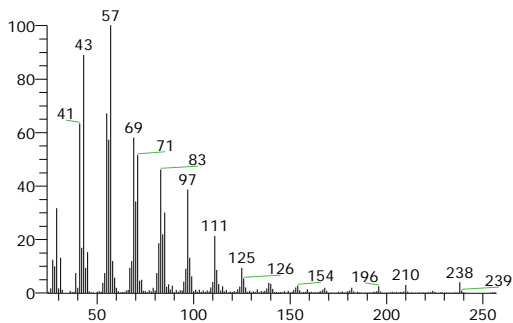

1-Hexadecanol, 2-methyl-  
Formula C17H36O, MW 256, CAS# 2490-48-4, Entry# 20717  
2-Methylhexadecan-1-ol

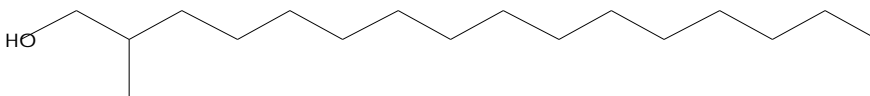

| RT    | Compound Name             | Molecular Weight | Molecular Formula | Cas #      | Area % | Library         |
|-------|---------------------------|------------------|-------------------|------------|--------|-----------------|
| 22.97 | DOTRIACONTANE             | 450              | C32H66            | 544-85-4   | 0.49   | WileyRegistry8e |
| 22.97 | 14-á-H-PREGNA             | 288              | C21H36            | NA         | 0.49   | WileyRegistry8e |
| 22.97 | 2,2-DIDEUTERO OCTADECANAL | 270              | C18H34D2O         | 56555-07-8 | 0.49   | WileyRegistry8e |
| 22.97 | 14-á-H-PREGNA             | 288              | C21H36            | NA         | 0.49   | WileyRegistry8e |

# My GC-MS Report

Hit Spectrum

Compound Structure



DOTRIACONTANE  
Formula C32H66, MW 450, CAS# 544-85-4, Entry# 274478  
A13-52367

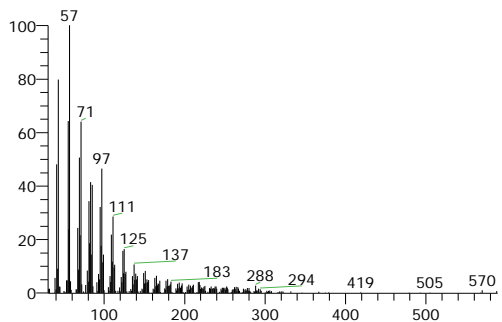

14-á-H-PREGNA  
Formula C21H36, MW 288, CAS# NA, Entry# 178939  
14-á-PREGNA

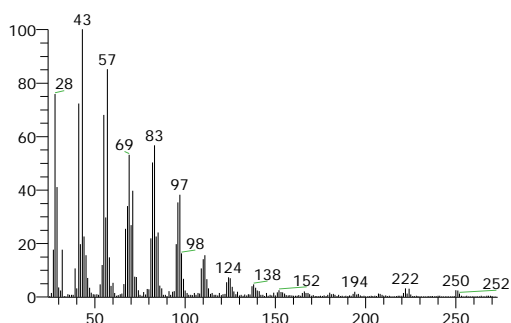

2,2-DIDEUTERO OCTADECANAL  
Formula C18H34D2O, MW 270, CAS# 56555-07-8, Entry# 159359

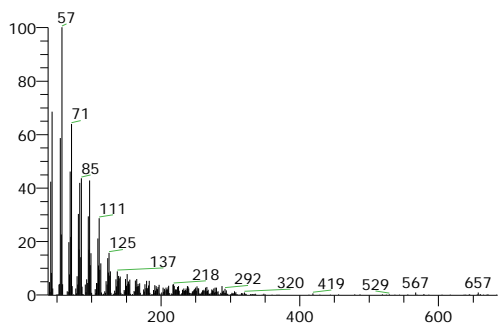

14-á-H-PREGNA  
Formula C21H36, MW 288, CAS# NA, Entry# 178938  
14-á-PREGNA

| RT    | Compound Name                               | Molecular Weight | Molecular Formula | Cas #          | Area % | Library         |
|-------|---------------------------------------------|------------------|-------------------|----------------|--------|-----------------|
| 23.10 | DOTRIACONTANE                               | 450              | C32H66            | 544-85-4       | 1.60   | WileyRegistry8e |
| 23.10 | 14-á-H-PREGNA                               | 288              | C21H36            | NA             | 1.60   | WileyRegistry8e |
| 23.10 | 2-OCTADECYLOXY-1,1,2,2-TETRADEUTE ROETHANOL | 318              | C20H38D4O2        | 56599-3<br>9-4 | 1.60   | WileyRegistry8e |
| 23.10 | 14-á-H-PREGNA                               | 288              | C21H36            | NA             | 1.60   | WileyRegistry8e |

# My GC-MS Report

Hit Spectrum

Compound Structure



DOTRIACONTANE  
Formula C32H66, MW 450, CAS# 544-85-4, Entry# 274478  
A13-52367

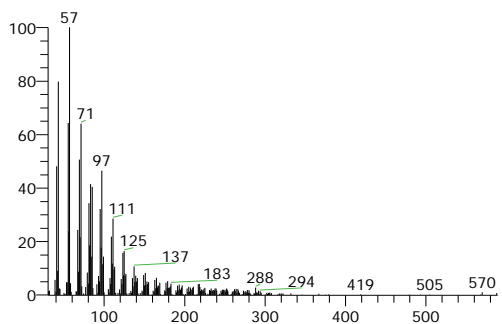

14-á-H-PREGNA  
Formula C21H36, MW 288, CAS# NA, Entry# 178939  
14-á-PREGNA

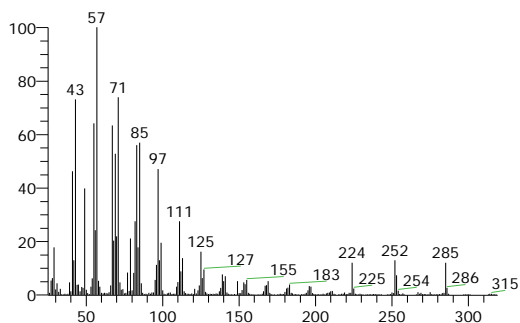

2-OCTADECYLOXY-1,1,2,2-TETRADEUTEROETHANOL  
Formula C20H38D4O2, MW 318, CAS# 56599-39-4, Entry# 202042

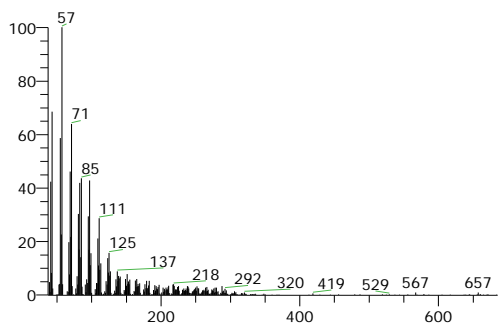

14-á-H-PREGNA  
Formula C21H36, MW 288, CAS# NA, Entry# 178938  
14-á-PREGNA

| RT    | Compound Name             | Molecular Weight | Molecular Formula | Cas #      | Area % | Library         |
|-------|---------------------------|------------------|-------------------|------------|--------|-----------------|
| 23.24 | DOTRIACONTANE             | 450              | C32H66            | 544-85-4   | 0.32   | WileyRegistry8e |
| 23.24 | 14-á-H-PREGNA             | 288              | C21H36            | NA         | 0.32   | WileyRegistry8e |
| 23.24 | 2,2-DIDEUTERO OCTADECANAL | 270              | C18H34D2O         | 56555-07-8 | 0.32   | WileyRegistry8e |
| 23.24 | 14-á-H-PREGNA             | 288              | C21H36            | NA         | 0.32   | WileyRegistry8e |



# My GC-MS Report

Hit Spectrum

Compound Structure



DOTRIACONTANE  
Formula C32H66, MW 450, CAS# 544-85-4, Entry# 274478  
A13-52367



14-á-H-PREGNA  
Formula C21H36, MW 288, CAS# NA, Entry# 178939  
14-á-PREGNA

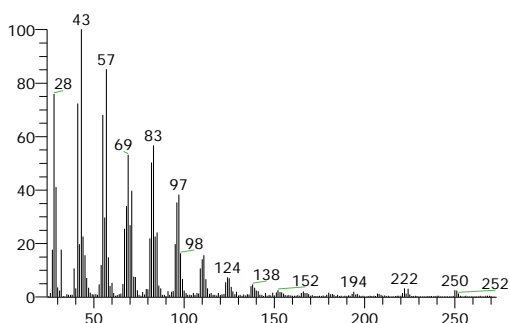

2,2-DIDEUTERO OCTADECANAL  
Formula C18H34D2O, MW 270, CAS# 56555-07-8, Entry# 159359

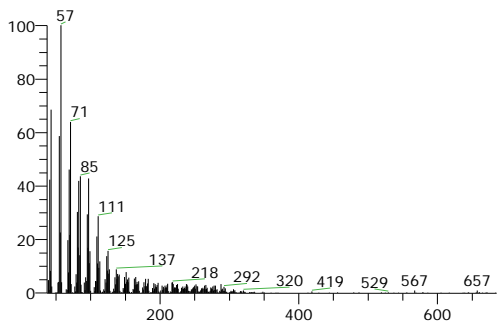

14-á-H-PREGNA  
Formula C21H36, MW 288, CAS# NA, Entry# 178938  
14-á-PREGNA

| RT    | Compound Name                              | Molecular Weight | Molecular Formula | Cas #      | Area % | Library         |
|-------|--------------------------------------------|------------------|-------------------|------------|--------|-----------------|
| 23.31 | DOTRIACONTANE                              | 450              | C32H66            | 544-85-4   | 0.56   | WileyRegistry8e |
| 23.31 | 14-á-H-PREGNA                              | 288              | C21H36            | NA         | 0.56   | WileyRegistry8e |
| 23.31 | 2,2-DIDEUTERO OCTADECANAL                  | 270              | C18H34D2O         | 56555-07-8 | 0.56   | WileyRegistry8e |
| 23.31 | 2-OCTADECYLOXY-1,1,2,2-TETRADEUTEROETHANOL | 318              | C20H38D4O2        | 56599-39-4 | 0.56   | WileyRegistry8e |

# My GC-MS Report

Hit Spectrum

Compound Structure



DOTRIACONTANE  
Formula C32H66, MW 450, CAS# 544-85-4, Entry# 274478  
A13-52367

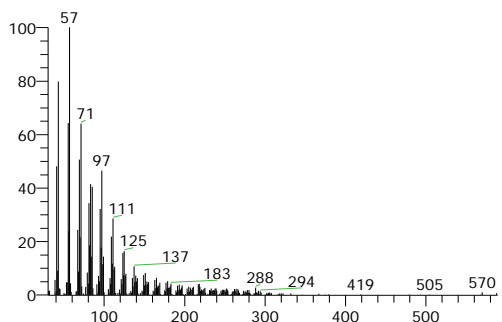

14-á-H-PREGNA  
Formula C21H36, MW 288, CAS# NA, Entry# 178939  
14-á-PREGNA

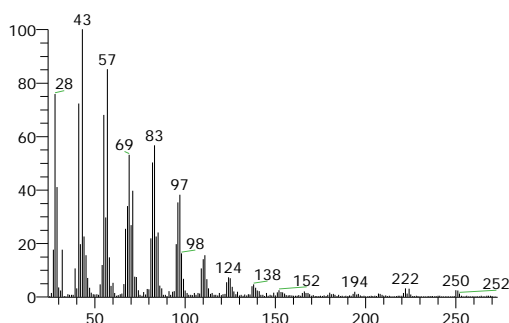

2,2-DIDEUTERO OCTADECANAL  
Formula C18H34D2O, MW 270, CAS# 56555-07-8, Entry# 159359

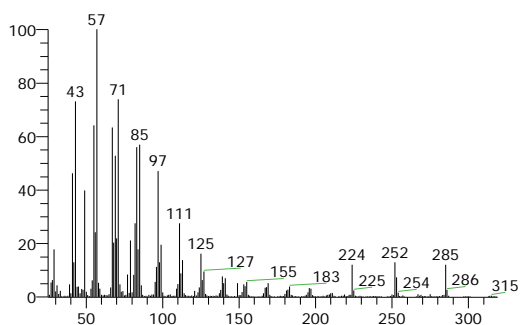

2-OCTADECYLOXY-1,1,2,2-TETRADEUTEROETHANOL  
Formula C20H38D4O2, MW 318, CAS# 56599-39-4, Entry# 202042

| RT    | Compound Name             | Molecular Weight | Molecular Formula | Cas #      | Area % | Library         |
|-------|---------------------------|------------------|-------------------|------------|--------|-----------------|
| 23.41 | 14-á-H-PREGNA             | 288              | C21H36            | NA         | 0.49   | WileyRegistry8e |
| 23.41 | DOTRIACONTANE             | 450              | C32H66            | 544-85-4   | 0.49   | WileyRegistry8e |
| 23.41 | 14-á-H-PREGNA             | 288              | C21H36            | NA         | 0.49   | WileyRegistry8e |
| 23.41 | 2,2-DIDEUTERO OCTADECANAL | 270              | C18H34D2O         | 56555-07-8 | 0.49   | WileyRegistry8e |

# My GC-MS Report

Hit Spectrum

Compound Structure



14-á-H-PREGNA  
Formula C21H36, MW 288, CAS# NA, Entry# 178939  
14-á-PREGNA



DOTRIACONTANE  
Formula C32H66, MW 450, CAS# 544-85-4, Entry# 274478  
AI3-52367

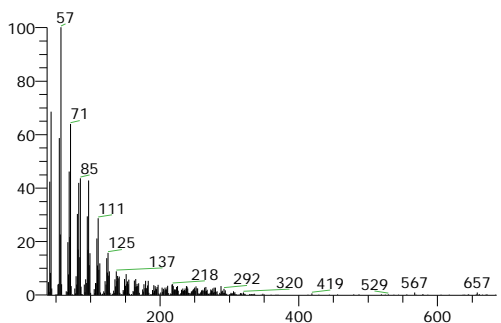

14-á-H-PREGNA  
Formula C21H36, MW 288, CAS# NA, Entry# 178938  
14-á-PREGNA



2,2-DIDEUTERO OCTADECANAL  
Formula C18H34D2O, MW 270, CAS# 56555-07-8, Entry# 159359

| RT    | Compound Name             | Molecular Weight | Molecular Formula | Cas #      | Area % | Library         |
|-------|---------------------------|------------------|-------------------|------------|--------|-----------------|
| 23.53 | 14-á-H-PREGNA             | 288              | C21H36            | NA         | 0.96   | WileyRegistry8e |
| 23.53 | DOTRIACONTANE             | 450              | C32H66            | 544-85-4   | 0.96   | WileyRegistry8e |
| 23.53 | 14-á-H-PREGNA             | 288              | C21H36            | NA         | 0.96   | WileyRegistry8e |
| 23.53 | 2,2-DIDEUTERO OCTADECANAL | 270              | C18H34D2O         | 56555-07-8 | 0.96   | WileyRegistry8e |

# My GC-MS Report

Hit Spectrum

Compound Structure

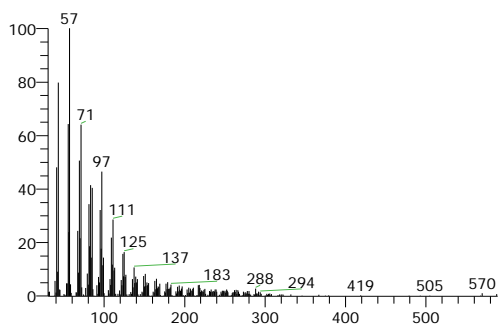

14-á-H-PREGNA  
Formula C21H36, MW 288, CAS# NA, Entry# 178939  
14-á-PREGNA

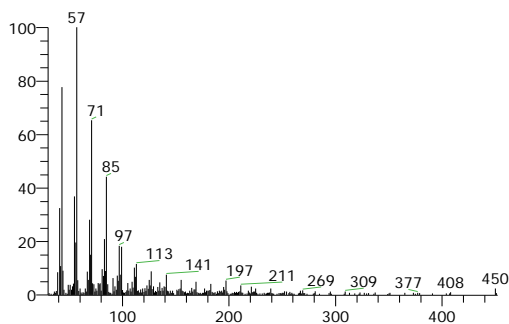

DOTRIACONTANE  
Formula C32H66, MW 450, CAS# 544-85-4, Entry# 274478  
AI3-52367

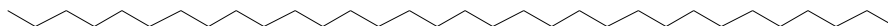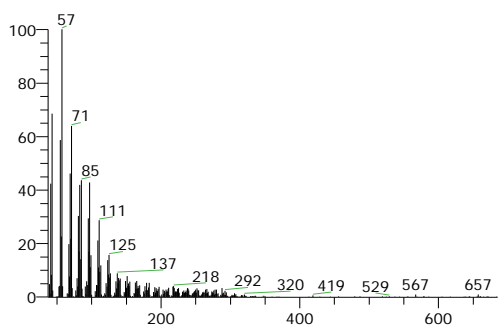

14-á-H-PREGNA  
Formula C21H36, MW 288, CAS# NA, Entry# 178938  
14-á-PREGNA

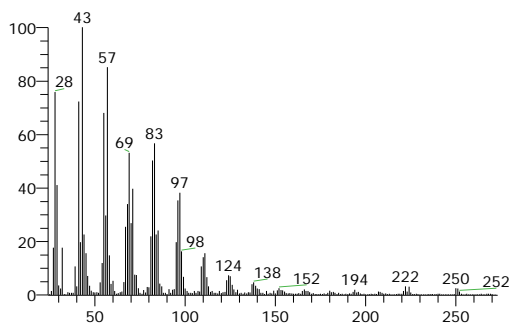

2,2-DIDEUTERO OCTADECANAL  
Formula C18H34D2O, MW 270, CAS# 56555-07-8, Entry# 159359

| RT    | Compound Name            | Molecular Weight | Molecular Formula | Cas #     | Area % | Library         |
|-------|--------------------------|------------------|-------------------|-----------|--------|-----------------|
| 23.95 | DOTRIACONTANE            | 450              | C32H66            | 544-85-4  | 4.89   | WileyRegistry8e |
| 23.95 | 14-á-H-PREGNA            | 288              | C21H36            | NA        | 4.89   | WileyRegistry8e |
| 23.95 | 1-HEXADECANOL, 2-METHYL- | 256              | C17H36O           | 2490-48-4 | 4.89   | WileyRegistry8e |
| 23.95 | 1-Hexadecanol, 2-methyl- | 256              | C17H36O           | 2490-48-4 | 4.89   | mainlib         |

# My GC-MS Report

Hit Spectrum

Compound Structure



**DOTRIACONTANE**  
 Formula C<sub>32</sub>H<sub>66</sub>, MW 450, CAS# 544-85-4, Entry# 274478  
 A13-52367



**14-á-H-PREGNA**  
 Formula C<sub>21</sub>H<sub>36</sub>, MW 288, CAS# NA, Entry# 178939  
 14-á-PREGNA

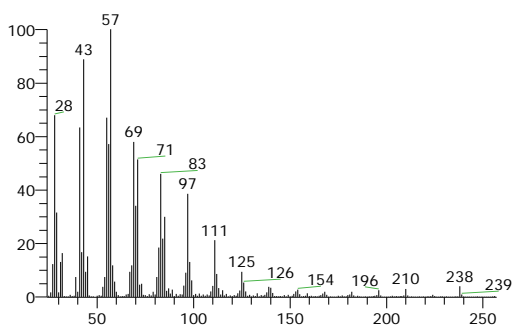

**1-HEXADECANOL, 2-METHYL-**  
 Formula C<sub>17</sub>H<sub>36</sub>O, MW 256, CAS# 2490-48-4, Entry# 146911  
 2-METHYLHEXADECAN-1-OL

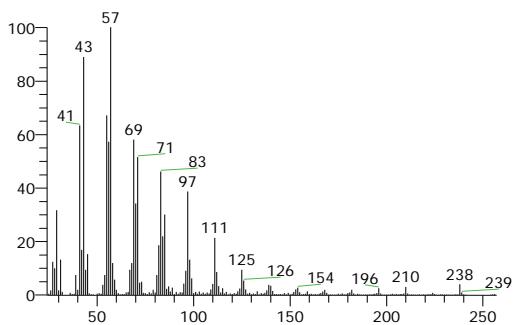

**1-Hexadecanol, 2-methyl-**  
 Formula C<sub>17</sub>H<sub>36</sub>O, MW 256, CAS# 2490-48-4, Entry# 20717  
 2-Methylhexadecan-1-ol



| RT    | Compound Name            | Molecular Weight | Molecular Formula                 | Cas #     | Area % | Library         |
|-------|--------------------------|------------------|-----------------------------------|-----------|--------|-----------------|
| 24.06 | DOTRIACONTANE            | 450              | C <sub>32</sub> H <sub>66</sub>   | 544-85-4  | 1.14   | WileyRegistry8e |
| 24.06 | 14-á-H-PREGNA            | 288              | C <sub>21</sub> H <sub>36</sub>   | NA        | 1.14   | WileyRegistry8e |
| 24.06 | 1-Hexadecanol, 2-methyl- | 256              | C <sub>17</sub> H <sub>36</sub> O | 2490-48-4 | 1.14   | mainlib         |
| 24.06 | 1-HEXADECANOL, 2-METHYL- | 256              | C <sub>17</sub> H <sub>36</sub> O | 2490-48-4 | 1.14   | WileyRegistry8e |

# My GC-MS Report

Hit Spectrum

Compound Structure



**DOTRIACONTANE**  
 Formula C32H66, MW 450, CAS# 544-85-4, Entry# 274478  
 AI3-52367

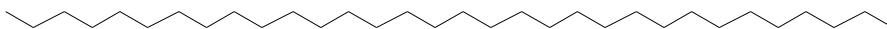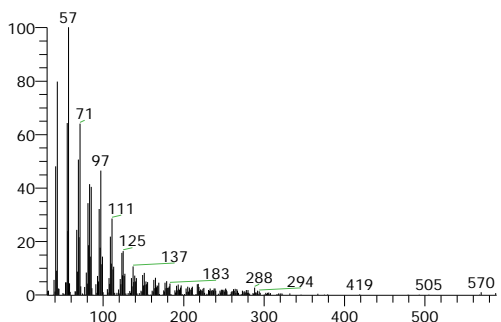

**14- $\alpha$ -H-PREGNA**  
 Formula C21H36, MW 288, CAS# NA, Entry# 178939  
 14- $\alpha$ -PREGNA



**1-Hexadecanol, 2-methyl-**  
 Formula C17H36O, MW 256, CAS# 2490-48-4, Entry# 20717  
 2-Methylhexadecan-1-ol

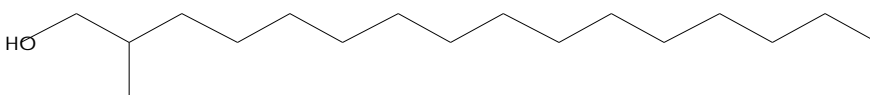

**1-HEXADECANOL, 2-METHYL-**  
 Formula C17H36O, MW 256, CAS# 2490-48-4, Entry# 146911  
 2-METHYLHEXADECAN-1-OL



| RT    | Compound Name             | Molecular Weight | Molecular Formula | Cas #      | Area % | Library         |
|-------|---------------------------|------------------|-------------------|------------|--------|-----------------|
| 24.23 | DOTRIACONTANE             | 450              | C32H66            | 544-85-4   | 0.33   | WileyRegistry8e |
| 24.23 | ISOCHIAPIN B              | 346              | C19H22O6          | NA         | 0.33   | WileyRegistry8e |
| 24.23 | ISOCHIAPIN B %2<          | 350              | C19H26O6          | NA         | 0.33   | WileyRegistry8e |
| 24.23 | 2,2-DIDEUTERO OCTADECANAL | 270              | C18H34D2O         | 56555-07-8 | 0.33   | WileyRegistry8e |

# My GC-MS Report

Hit Spectrum

Compound Structure



DOTRIACONTANE  
Formula C<sub>32</sub>H<sub>66</sub>, MW 450, CAS# 544-85-4, Entry# 274478  
A13-52367



SI 735, RSI 743, WileyRegistry8e, Entry# 225807, CAS# NA, ISOCHIAPIN B

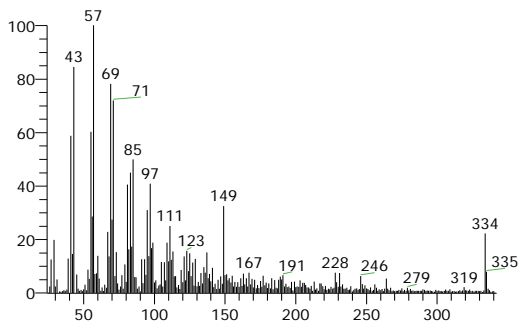

ISOCHIAPIN B  
Formula C<sub>19</sub>H<sub>22</sub>O<sub>6</sub>, MW 346, CAS# NA, Entry# 225807

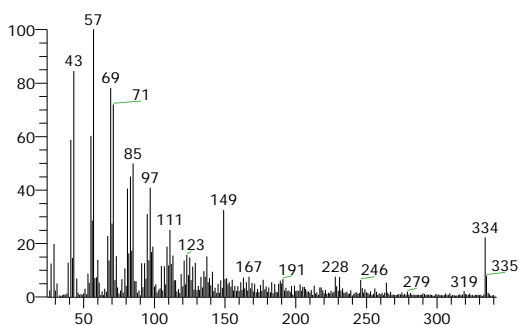

ISOCHIAPIN B %2<  
Formula C<sub>19</sub>H<sub>26</sub>O<sub>6</sub>, MW 350, CAS# NA, Entry# 228500



2,2-DIDEUTERO OCTADECANAL  
Formula C<sub>18</sub>H<sub>34</sub>D<sub>2</sub>O, MW 270, CAS# 56555-07-8, Entry# 159359

| RT    | Compound Name            | Molecular Weight | Molecular Formula                              | Cas #    | Area % | Library         |
|-------|--------------------------|------------------|------------------------------------------------|----------|--------|-----------------|
| 24.37 | ISOPROPYL TETRADECANOATE | 270              | C <sub>17</sub> H <sub>34</sub> O <sub>2</sub> | 110-27-0 | 7.72   | WileyRegistry8e |
| 24.37 | Isopropyl Myristate      | 270              | C <sub>17</sub> H <sub>34</sub> O <sub>2</sub> | 110-27-0 | 7.72   | replib          |
| 24.37 | ISOPROPYL MYRISTATE      | 270              | C <sub>17</sub> H <sub>34</sub> O <sub>2</sub> | NA       | 7.72   | WileyRegistry8e |
| 24.37 | Isopropyl Myristate      | 270              | C <sub>17</sub> H <sub>34</sub> O <sub>2</sub> | 110-27-0 | 7.72   | replib          |

# My GC-MS Report

Hit Spectrum

Compound Structure

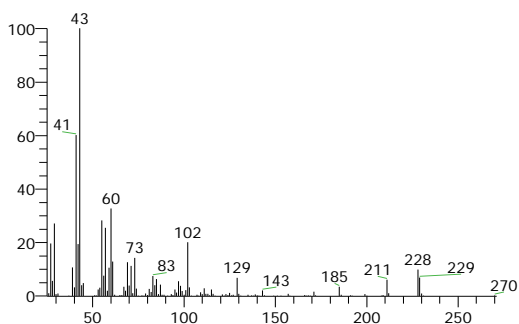

SI 784, RSI 845, replib, Entry# 2232, CAS# 110-27-0, Isopropyl Myristate

ISOPROPYL TETRADECANOATE  
Formula C17H34O2, MW 270, CAS# 110-27-0, Entry# 161319  
1-METHYLETHYL TETRADECANOATE

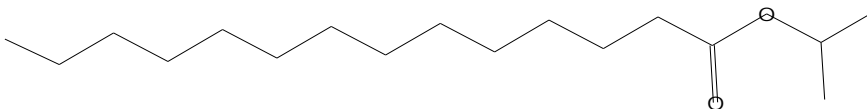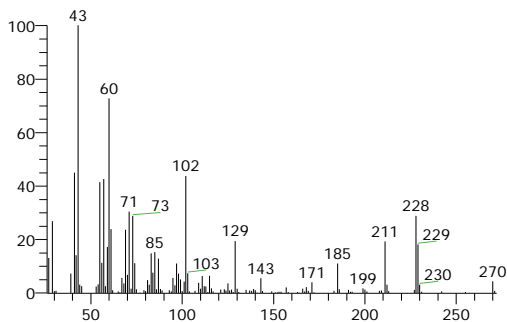

SI 780, RSI 830, replib, Entry# 2233, CAS# 110-27-0, Isopropyl Myristate

Isopropyl Myristate  
Formula C17H34O2, MW 270, CAS# 110-27-0, Entry# 2232  
Tetradecanoic acid, 1-methylethyl ester

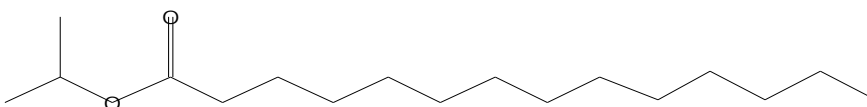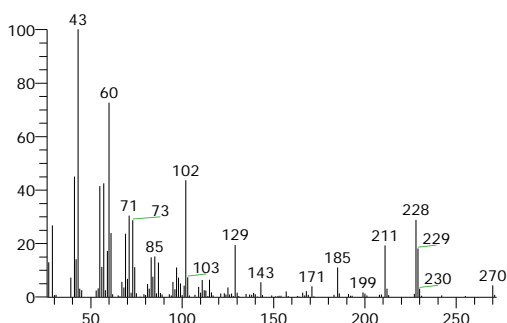

ISOPROPYL MYRISTATE  
Formula C17H34O2, MW 270, CAS# NA, Entry# 384718  
TETRADECANOIC ACID, 1-METHYLETHYL ESTER

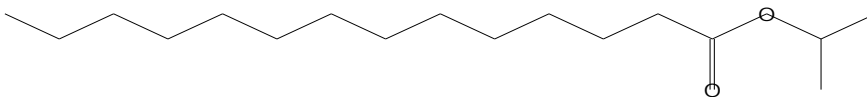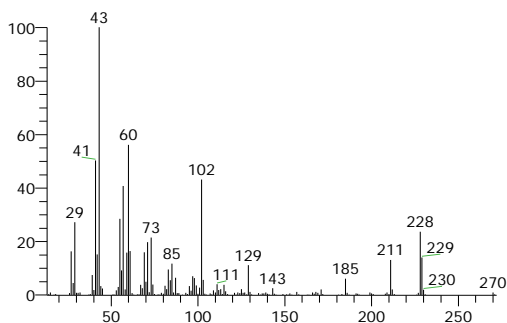

Isopropyl Myristate  
Formula C17H34O2, MW 270, CAS# 110-27-0, Entry# 2233  
Tetradecanoic acid, 1-methylethyl ester

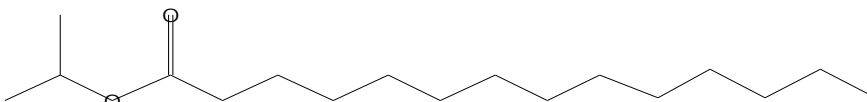

| RT    | Compound Name    | Molecular Weight | Molecular Formula | Cas #    | Area % | Library         |
|-------|------------------|------------------|-------------------|----------|--------|-----------------|
| 24.86 | DOTRIACONTANE    | 450              | C32H66            | 544-85-4 | 0.10   | WileyRegistry8e |
| 24.86 | 14-á-H-PREGNA    | 288              | C21H36            | NA       | 0.10   | WileyRegistry8e |
| 24.86 | ISOCHIAPIN B     | 346              | C19H22O6          | NA       | 0.10   | WileyRegistry8e |
| 24.86 | ISOCHIAPIN B %2< | 350              | C19H26O6          | NA       | 0.10   | WileyRegistry8e |



# My GC-MS Report

Hit Spectrum

Compound Structure



DOTRIACONTANE  
Formula C32H66, MW 450, CAS# 544-85-4, Entry# 274478  
A13-52367

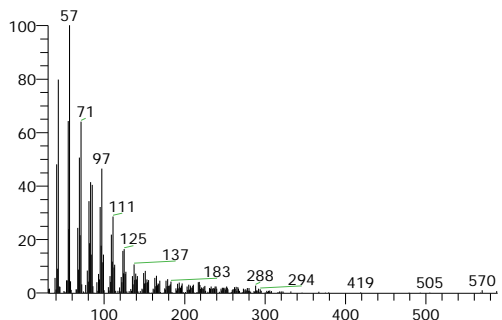

14-á-H-PREGNA  
Formula C21H36, MW 288, CAS# NA, Entry# 178939  
14-á-PREGNA

SI 760, RSI 772, WileyRegistry8e, Entry# 225807, CAS# NA, ISOCHIAPIN B

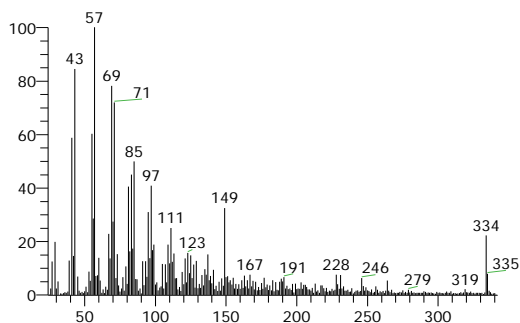

ISOCHIAPIN B  
Formula C19H22O6, MW 346, CAS# NA, Entry# 225807

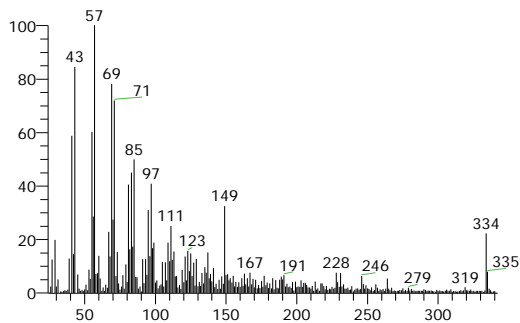

ISOCHIAPIN B %2<  
Formula C19H26O6, MW 350, CAS# NA, Entry# 228500

| RT    | Compound Name    | Molecular Weight | Molecular Formula | Cas #    | Area % | Library         |
|-------|------------------|------------------|-------------------|----------|--------|-----------------|
| 24.96 | DOTRIACONTANE    | 450              | C32H66            | 544-85-4 | 0.30   | WileyRegistry8e |
| 24.96 | 14-á-H-PREGNA    | 288              | C21H36            | NA       | 0.30   | WileyRegistry8e |
| 24.96 | ISOCHIAPIN B     | 346              | C19H22O6          | NA       | 0.30   | WileyRegistry8e |
| 24.96 | ISOCHIAPIN B %2< | 350              | C19H26O6          | NA       | 0.30   | WileyRegistry8e |

# My GC-MS Report

Hit Spectrum

Compound Structure



DOTRIACONTANE  
Formula C32H66, MW 450, CAS# 544-85-4, Entry# 274478  
A13-52367



14-á-H-PREGNA  
Formula C21H36, MW 288, CAS# NA, Entry# 178939  
14-á-PREGNA

SI 750, RSI 763, WileyRegistry8e, Entry# 225807, CAS# NA, ISOCHIAPIN B



ISOCHIAPIN B  
Formula C19H22O6, MW 346, CAS# NA, Entry# 225807



ISOCHIAPIN B %2<  
Formula C19H26O6, MW 350, CAS# NA, Entry# 228500

| RT    | Compound Name    | Molecular Weight | Molecular Formula | Cas #    | Area % | Library         |
|-------|------------------|------------------|-------------------|----------|--------|-----------------|
| 25.21 | DOTRIACONTANE    | 450              | C32H66            | 544-85-4 | 1.26   | WileyRegistry8e |
| 25.21 | 14-á-H-PREGNA    | 288              | C21H36            | NA       | 1.26   | WileyRegistry8e |
| 25.21 | ISOCHIAPIN B     | 346              | C19H22O6          | NA       | 1.26   | WileyRegistry8e |
| 25.21 | ISOCHIAPIN B %2< | 350              | C19H26O6          | NA       | 1.26   | WileyRegistry8e |

# My GC-MS Report

Hit Spectrum

Compound Structure



DOTRIACONTANE  
Formula C32H66, MW 450, CAS# 544-85-4, Entry# 274478  
A13-52367



14-á-H-PREGNA  
Formula C21H36, MW 288, CAS# NA, Entry# 178939  
14-á-PREGNA

SI 722, RSI 743, WileyRegistry8e, Entry# 225807, CAS# NA, ISOCHIAPIN B

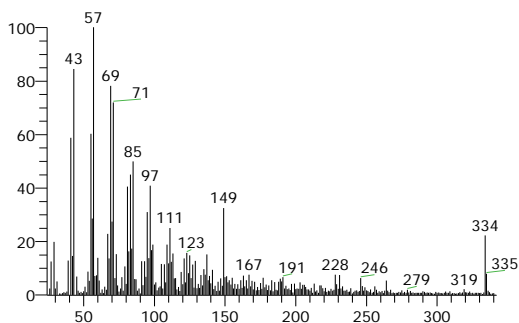

ISOCHIAPIN B  
Formula C19H22O6, MW 346, CAS# NA, Entry# 225807

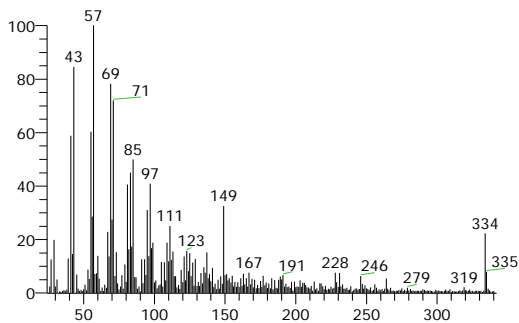

ISOCHIAPIN B %2<  
Formula C19H26O6, MW 350, CAS# NA, Entry# 228500

| RT    | Compound Name            | Molecular Weight | Molecular Formula | Cas #     | Area % | Library         |
|-------|--------------------------|------------------|-------------------|-----------|--------|-----------------|
| 25.66 | DOTRIACONTANE            | 450              | C32H66            | 544-85-4  | 5.60   | WileyRegistry8e |
| 25.66 | 1-Hexadecanol, 2-methyl- | 256              | C17H36O           | 2490-48-4 | 5.60   | mainlib         |
| 25.66 | 1-HEXADECANOL, 2-METHYL- | 256              | C17H36O           | 2490-48-4 | 5.60   | WileyRegistry8e |
| 25.66 | 14-á-H-PREGNA            | 288              | C21H36            | NA        | 5.60   | WileyRegistry8e |

# My GC-MS Report

Hit Spectrum

Compound Structure



DOTRIACONTANE  
Formula C32H66, MW 450, CAS# 544-85-4, Entry# 274478  
A13-52367

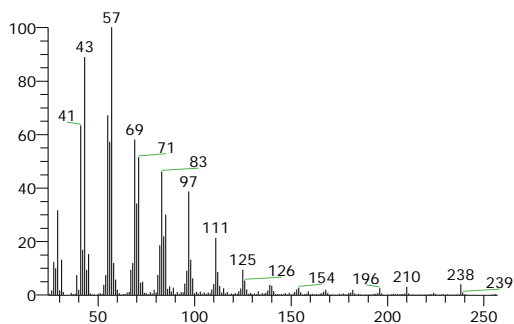

1-Hexadecanol, 2-methyl-  
Formula C17H36O, MW 256, CAS# 2490-48-4, Entry# 20717  
2-Methylhexadecan-1-ol

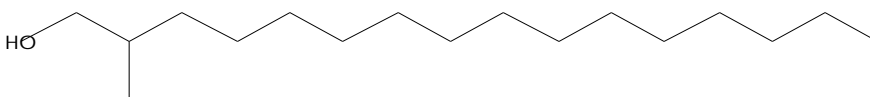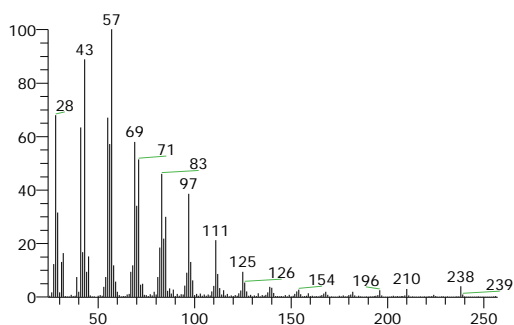

1-HEXADECANOL, 2-METHYL-  
Formula C17H36O, MW 256, CAS# 2490-48-4, Entry# 146911  
2-METHYLHEXADECAN-1-OL

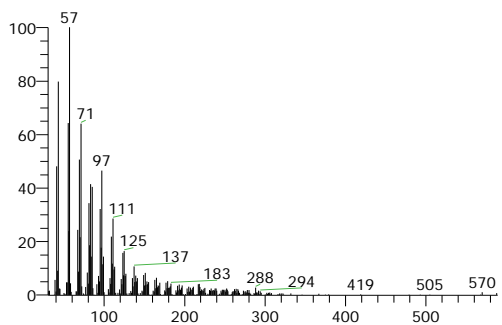

14-á-H-PREGNA  
Formula C21H36, MW 288, CAS# NA, Entry# 178939  
14-á-PREGNA

| RT    | Compound Name            | Molecular Weight | Molecular Formula | Cas #     | Area % | Library         |
|-------|--------------------------|------------------|-------------------|-----------|--------|-----------------|
| 25.74 | DOTRIACONTANE            | 450              | C32H66            | 544-85-4  | 4.19   | WileyRegistry8e |
| 25.74 | 14-á-H-PREGNA            | 288              | C21H36            | NA        | 4.19   | WileyRegistry8e |
| 25.74 | 1-HEXADECANOL, 2-METHYL- | 256              | C17H36O           | 2490-48-4 | 4.19   | WileyRegistry8e |
| 25.74 | 1-Hexadecanol, 2-methyl- | 256              | C17H36O           | 2490-48-4 | 4.19   | mainlib         |

# My GC-MS Report

Hit Spectrum

Compound Structure



DOTRIACONTANE  
Formula C32H66, MW 450, CAS# 544-85-4, Entry# 274478  
A13-52367



14-á-H-PREGNA  
Formula C21H36, MW 288, CAS# NA, Entry# 178939  
14-á-PREGNA



1-HEXADECANOL, 2-METHYL-  
2-METHYLHEXADECAN-1-OL  
Formula C17H36O, MW 256, CAS# 2490-48-4, Entry# 146911

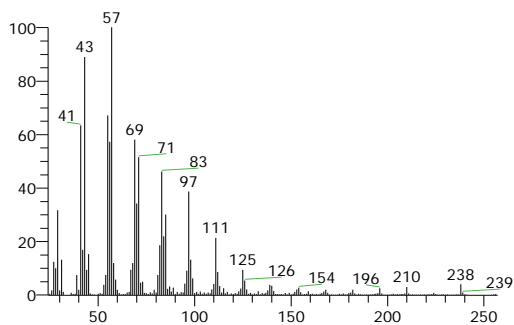

1-Hexadecanol, 2-methyl-  
2-Methylhexadecan-1-ol  
Formula C17H36O, MW 256, CAS# 2490-48-4, Entry# 20717



| RT    | Compound Name                     | Molecular Weight | Molecular Formula | Cas #    | Area % | Library         |
|-------|-----------------------------------|------------------|-------------------|----------|--------|-----------------|
| 26.08 | DOTRIACONTANE                     | 450              | C32H66            | 544-85-4 | 0.46   | WileyRegistry8e |
| 26.08 | 14-á-H-PREGNA                     | 288              | C21H36            | NA       | 0.46   | WileyRegistry8e |
| 26.08 | 14-á-H-PREGNA                     | 288              | C21H36            | NA       | 0.46   | WileyRegistry8e |
| 26.08 | Tetrapentacontane, 1,5,4-dibromo- | 914              | C54H108Br2        | NA       | 0.46   | mainlib         |

# My GC-MS Report

Hit Spectrum

Compound Structure

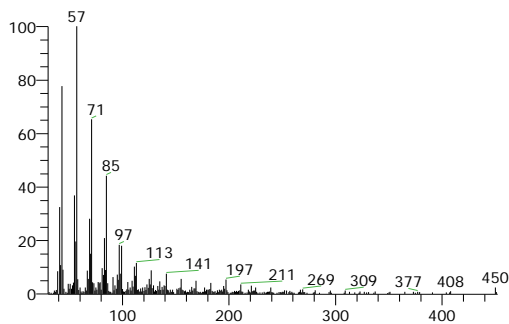

DOTRIACONTANE  
Formula C32H66, MW 450, CAS# 544-85-4, Entry# 274478  
AI3-52367

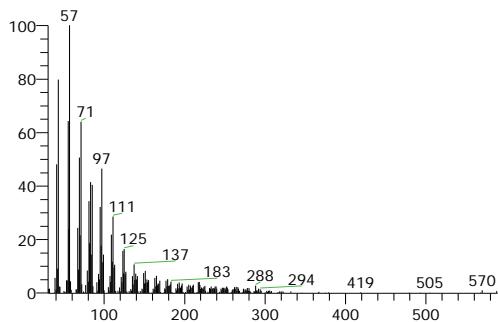

14-á-H-PREGNA  
Formula C21H36, MW 288, CAS# NA, Entry# 178939  
14-á-PREGNA

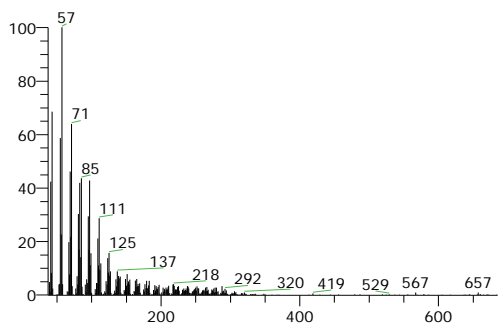

14-á-H-PREGNA  
Formula C21H36, MW 288, CAS# NA, Entry# 178938  
14-á-PREGNA

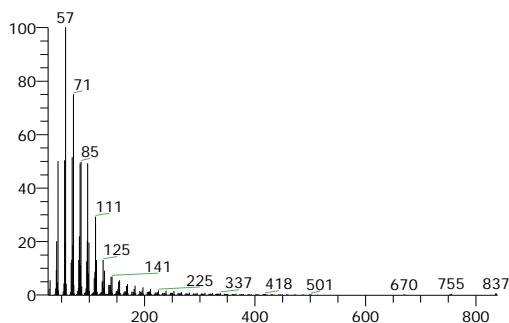

Tetrapentacontane, 1,54-dibromo-  
Formula C54H108Br2, MW 914, CAS# NA, Entry# 21687

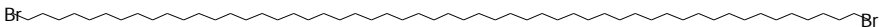

| RT    | Compound Name | Molecular Weight | Molecular Formula | Cas #    | Area % | Library         |
|-------|---------------|------------------|-------------------|----------|--------|-----------------|
| 26.25 | DOTRIACONTANE | 450              | C32H66            | 544-85-4 | 4.18   | WileyRegistry8e |
| 26.25 | 14-á-H-PREGNA | 288              | C21H36            | NA       | 4.18   | WileyRegistry8e |
| 26.25 | 14-á-H-PREGNA | 288              | C21H36            | NA       | 4.18   | WileyRegistry8e |
| 26.25 | ISOCHIAPIN B  | 346              | C19H22O6          | NA       | 4.18   | WileyRegistry8e |

# My GC-MS Report

Hit Spectrum

Compound Structure



DOTRIACONTANE  
Formula C32H66, MW 450, CAS# 544-85-4, Entry# 274478  
AI3-52367



14-á-H-PREGNA  
Formula C21H36, MW 288, CAS# NA, Entry# 178939  
14-á-PREGNA



14-á-H-PREGNA  
Formula C21H36, MW 288, CAS# NA, Entry# 178938  
14-á-PREGNA

SI 739, RSI 751, WileyRegistry8e, Entry# 225807, CAS# NA, ISOCHIAPIN B

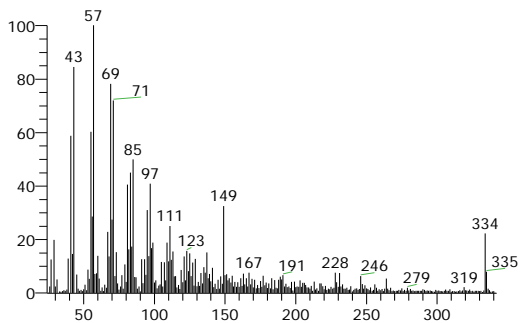

ISOCHIAPIN B  
Formula C19H22O6, MW 346, CAS# NA, Entry# 225807

| RT    | Compound Name             | Molecular Weight | Molecular Formula | Cas #      | Area % | Library         |
|-------|---------------------------|------------------|-------------------|------------|--------|-----------------|
| 26.79 | DOTRIACONTANE             | 450              | C32H66            | 544-85-4   | 3.79   | WileyRegistry8e |
| 26.79 | 14-á-H-PREGNA             | 288              | C21H36            | NA         | 3.79   | WileyRegistry8e |
| 26.79 | 14-á-H-PREGNA             | 288              | C21H36            | NA         | 3.79   | WileyRegistry8e |
| 26.79 | 2,2-DIDEUTERO OCTADECANAL | 270              | C18H34D2O         | 56555-07-8 | 3.79   | WileyRegistry8e |

# My GC-MS Report

Hit Spectrum

Compound Structure



DOTRIACONTANE  
Formula C32H66, MW 450, CAS# 544-85-4, Entry# 274478  
A13-52367



14-á-H-PREGNA  
Formula C21H36, MW 288, CAS# NA, Entry# 178939  
14-á-PREGNA



14-á-H-PREGNA  
Formula C21H36, MW 288, CAS# NA, Entry# 178938  
14-á-PREGNA

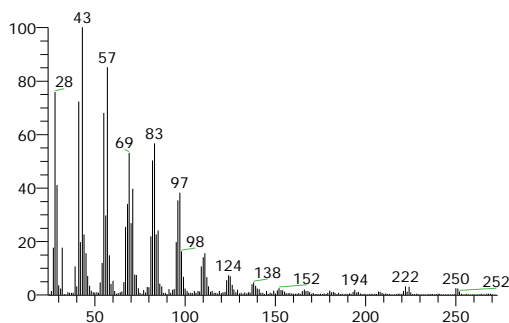

2,2-DIDEUTERO OCTADECANAL  
Formula C18H34D2O, MW 270, CAS# 56555-07-8, Entry# 159359

| RT    | Compound Name | Molecular Weight | Molecular Formula | Cas # | Area % | Library         |
|-------|---------------|------------------|-------------------|-------|--------|-----------------|
| 27.30 | 14-á-H-PREGNA | 288              | C21H36            | NA    | 2.97   | WileyRegistry8e |
| 27.30 | 14-á-H-PREGNA | 288              | C21H36            | NA    | 2.97   | WileyRegistry8e |
| 27.30 | HAHNFETT      | 0                | N/A               | NA    | 2.97   | WileyRegistry8e |
| 27.30 | HAHNFETT      | 0                | N/A               | NA    | 2.97   | WileyRegistry8e |



# My GC-MS Report

Hit Spectrum

Compound Structure



14- $\alpha$ -H-PREGNA  
Formula C<sub>21</sub>H<sub>36</sub>, MW 288, CAS# NA, Entry# 178939  
14- $\alpha$ -PREGNA

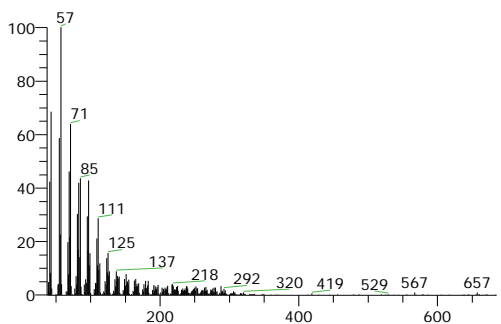

14- $\alpha$ -H-PREGNA  
Formula C<sub>21</sub>H<sub>36</sub>, MW 288, CAS# NA, Entry# 178938  
14- $\alpha$ -PREGNA

SI 706, RSI 712, WileyRegistry8e, Entry# 305496, CAS# NA, HAHNFETT

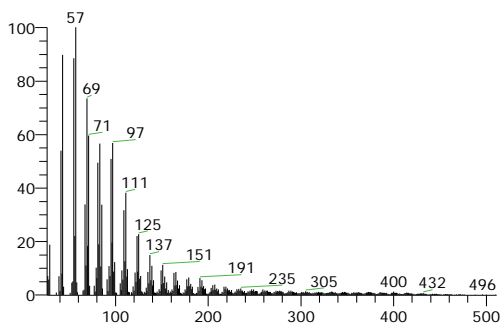

HAHNFETT  
Formula , MW 0, CAS# NA, Entry# 305496

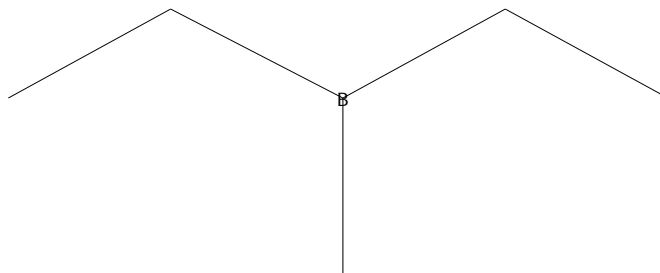

SI 706, RSI 712, WileyRegistry8e, Entry# 391160, CAS# NA, HAHNFETT

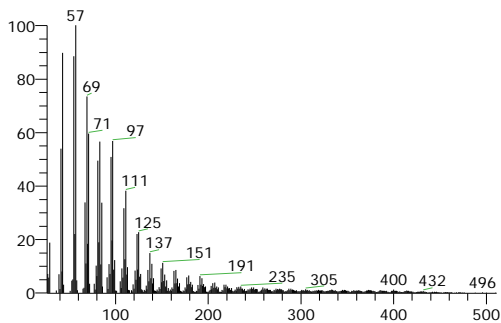

HAHNFETT  
Formula , MW 0, CAS# NA, Entry# 391160

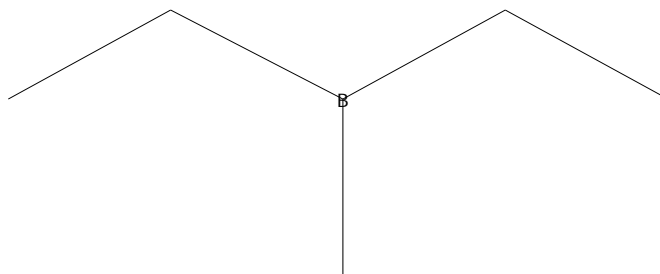

| RT    | Compound Name          | Molecular Weight | Molecular Formula                              | Cas #    | Area % | Library         |
|-------|------------------------|------------------|------------------------------------------------|----------|--------|-----------------|
| 27.58 | DOTRIACONTANE          | 450              | C <sub>32</sub> H <sub>66</sub>                | 544-85-4 | 2.35   | WileyRegistry8e |
| 27.58 | 14- $\alpha$ -H-PREGNA | 288              | C <sub>21</sub> H <sub>36</sub>                | NA       | 2.35   | WileyRegistry8e |
| 27.58 | ISOCHIAPIN B           | 346              | C <sub>19</sub> H <sub>22</sub> O <sub>6</sub> | NA       | 2.35   | WileyRegistry8e |
| 27.58 | ISOCHIAPIN B %2<       | 350              | C <sub>19</sub> H <sub>26</sub> O <sub>6</sub> | NA       | 2.35   | WileyRegistry8e |

# My GC-MS Report

Hit Spectrum

Compound Structure



DOTRIACONTANE  
Formula C32H66, MW 450, CAS# 544-85-4, Entry# 274478  
A13-52367



14-á-H-PREGNA  
Formula C21H36, MW 288, CAS# NA, Entry# 178939  
14-á-PREGNA

SI 748, RSI 760, WileyRegistry8e, Entry# 225807, CAS# NA, ISOCHIAPIN B



ISOCHIAPIN B  
Formula C19H22O6, MW 346, CAS# NA, Entry# 225807



ISOCHIAPIN B %2<  
Formula C19H26O6, MW 350, CAS# NA, Entry# 228500

| RT    | Compound Name            | Molecular Weight | Molecular Formula | Cas #     | Area % | Library         |
|-------|--------------------------|------------------|-------------------|-----------|--------|-----------------|
| 28.05 | DOTRIACONTANE            | 450              | C32H66            | 544-85-4  | 13.79  | WileyRegistry8e |
| 28.05 | 14-á-H-PREGNA            | 288              | C21H36            | NA        | 13.79  | WileyRegistry8e |
| 28.05 | 14-á-H-PREGNA            | 288              | C21H36            | NA        | 13.79  | WileyRegistry8e |
| 28.05 | 1-HEXADECANOL, 2-METHYL- | 256              | C17H36O           | 2490-48-4 | 13.79  | WileyRegistry8e |

# My GC-MS Report

Hit Spectrum

Compound Structure



DOTRIACONTANE  
Formula C32H66, MW 450, CAS# 544-85-4, Entry# 274478  
AI3-52367



14-á-H-PREGNA  
Formula C21H36, MW 288, CAS# NA, Entry# 178939  
14-á-PREGNA



14-á-H-PREGNA  
Formula C21H36, MW 288, CAS# NA, Entry# 178938  
14-á-PREGNA



1-HEXADECANOL, 2-METHYL-  
Formula C17H36O, MW 256, CAS# 2490-48-4, Entry# 146911  
2-METHYLHEXADECAN-1-OL



| RT    | Compound Name            | Molecular Weight | Molecular Formula | Cas #     | Area % | Library         |
|-------|--------------------------|------------------|-------------------|-----------|--------|-----------------|
| 28.25 | DOTRIACONTANE            | 450              | C32H66            | 544-85-4  | 0.28   | WileyRegistry8e |
| 28.25 | 14-á-H-PREGNA            | 288              | C21H36            | NA        | 0.28   | WileyRegistry8e |
| 28.25 | 14-á-H-PREGNA            | 288              | C21H36            | NA        | 0.28   | WileyRegistry8e |
| 28.25 | 1-HEXADECANOL, 2-METHYL- | 256              | C17H36O           | 2490-48-4 | 0.28   | WileyRegistry8e |

# My GC-MS Report

Hit Spectrum

Compound Structure



DOTRIACONTANE  
Formula C32H66, MW 450, CAS# 544-85-4, Entry# 274478  
AI3-52367



14-á-H-PREGNA  
Formula C21H36, MW 288, CAS# NA, Entry# 178939  
14-á-PREGNA



14-á-H-PREGNA  
Formula C21H36, MW 288, CAS# NA, Entry# 178938  
14-á-PREGNA



1-HEXADECANOL, 2-METHYL-  
Formula C17H36O, MW 256, CAS# 2490-48-4, Entry# 146911  
2-METHYLHEXADECAN-1-OL



| RT    | Compound Name             | Molecular Weight | Molecular Formula | Cas #      | Area % | Library         |
|-------|---------------------------|------------------|-------------------|------------|--------|-----------------|
| 28.49 | DOTRIACONTANE             | 450              | C32H66            | 544-85-4   | 3.50   | WileyRegistry8e |
| 28.49 | 14-á-H-PREGNA             | 288              | C21H36            | NA         | 3.50   | WileyRegistry8e |
| 28.49 | 14-á-H-PREGNA             | 288              | C21H36            | NA         | 3.50   | WileyRegistry8e |
| 28.49 | 2,2-DIDEUTERO OCTADECANAL | 270              | C18H34D2O         | 56555-07-8 | 3.50   | WileyRegistry8e |

# My GC-MS Report

Hit Spectrum

Compound Structure



DOTRIACONTANE  
Formula C32H66, MW 450, CAS# 544-85-4, Entry# 274478  
A13-52367



14-á-H-PREGNA  
Formula C21H36, MW 288, CAS# NA, Entry# 178939  
14-á-PREGNA



14-á-H-PREGNA  
Formula C21H36, MW 288, CAS# NA, Entry# 178938  
14-á-PREGNA



2,2-DIDEUTERO OCTADECANAL  
Formula C18H34D2O, MW 270, CAS# 56555-07-8, Entry# 159359

| RT    | Compound Name | Molecular Weight | Molecular Formula | Cas #    | Area % | Library         |
|-------|---------------|------------------|-------------------|----------|--------|-----------------|
| 28.88 | DOTRIACONTANE | 450              | C32H66            | 544-85-4 | 4.29   | WileyRegistry8e |
| 28.88 | 14-á-H-PREGNA | 288              | C21H36            | NA       | 4.29   | WileyRegistry8e |
| 28.88 | 14-á-H-PREGNA | 288              | C21H36            | NA       | 4.29   | WileyRegistry8e |
| 28.88 | ISOCHIAPIN B  | 346              | C19H22O6          | NA       | 4.29   | WileyRegistry8e |

# My GC-MS Report

Hit Spectrum

Compound Structure



DOTRIACONTANE  
Formula C32H66, MW 450, CAS# 544-85-4, Entry# 274478  
A13-52367



14-á-H-PREGNA  
Formula C21H36, MW 288, CAS# NA, Entry# 178939  
14-á-PREGNA



14-á-H-PREGNA  
Formula C21H36, MW 288, CAS# NA, Entry# 178938  
14-á-PREGNA

SI 730, RSI 749, WileyRegistry8e, Entry# 225807, CAS# NA, ISOCHIAPIN B



ISOCHIAPIN B  
Formula C19H22O6, MW 346, CAS# NA, Entry# 225807

| RT    | Compound Name | Molecular Weight | Molecular Formula | Cas #    | Area % | Library         |
|-------|---------------|------------------|-------------------|----------|--------|-----------------|
| 29.10 | DOTRIACONTANE | 450              | C32H66            | 544-85-4 | 4.04   | WileyRegistry8e |
| 29.10 | 14-á-H-PREGNA | 288              | C21H36            | NA       | 4.04   | WileyRegistry8e |
| 29.10 | 14-á-H-PREGNA | 288              | C21H36            | NA       | 4.04   | WileyRegistry8e |
| 29.10 | ISOCHIAPIN B  | 346              | C19H22O6          | NA       | 4.04   | WileyRegistry8e |

# My GC-MS Report

Hit Spectrum

Compound Structure



DOTRIACONTANE  
Formula C32H66, MW 450, CAS# 544-85-4, Entry# 274478  
A13-52367



14-á-H-PREGNA  
Formula C21H36, MW 288, CAS# NA, Entry# 178939  
14-á-PREGNA



14-á-H-PREGNA  
Formula C21H36, MW 288, CAS# NA, Entry# 178938  
14-á-PREGNA

SI 731, RSI 748, WileyRegistry8e, Entry# 225807, CAS# NA, ISOCHIAPIN B

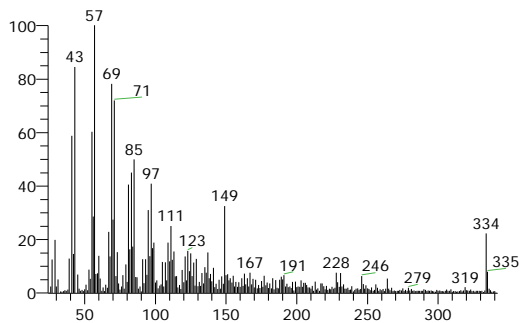

ISOCHIAPIN B  
Formula C19H22O6, MW 346, CAS# NA, Entry# 225807

| RT    | Compound Name       | Molecular Weight | Molecular Formula | Cas #     | Area % | Library         |
|-------|---------------------|------------------|-------------------|-----------|--------|-----------------|
| 29.33 | DOTRIACONTANE       | 450              | C32H66            | 544-85-4  | 1.96   | WileyRegistry8e |
| 29.33 | 14-á-H-PREGNA       | 288              | C21H36            | NA        | 1.96   | WileyRegistry8e |
| 29.33 | 14-á-H-PREGNA       | 288              | C21H36            | NA        | 1.96   | WileyRegistry8e |
| 29.33 | 17-Pentatriacontene | 490              | C35H70            | 6971-40-0 | 1.96   | mainlib         |

# My GC-MS Report

Hit Spectrum

Compound Structure



DOTRIACONTANE  
Formula C32H66, MW 450, CAS# 544-85-4, Entry# 274478  
AI3-52367



14-á-H-PREGNA  
Formula C21H36, MW 288, CAS# NA, Entry# 178939  
14-á-PREGNA



14-á-H-PREGNA  
Formula C21H36, MW 288, CAS# NA, Entry# 178938  
14-á-PREGNA

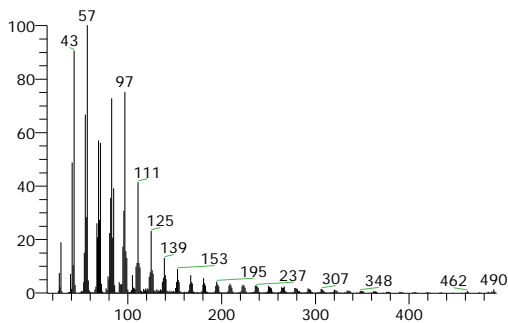

17-Pentatriacontene  
Formula C35H70, MW 490, CAS# 6971-40-0, Entry# 21018  
(17E)-17-Pentatriacontene #

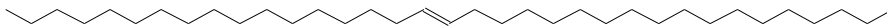

| RT    | Compound Name | Molecular Weight | Molecular Formula | Cas #    | Area % | Library         |
|-------|---------------|------------------|-------------------|----------|--------|-----------------|
| 29.55 | DOTRIACONTANE | 450              | C32H66            | 544-85-4 | 2.26   | WileyRegistry8e |
| 29.55 | 14-á-H-PREGNA | 288              | C21H36            | NA       | 2.26   | WileyRegistry8e |
| 29.55 | 14-á-H-PREGNA | 288              | C21H36            | NA       | 2.26   | WileyRegistry8e |
| 29.55 | ISOCHIAPIN B  | 346              | C19H22O6          | NA       | 2.26   | WileyRegistry8e |



# My GC-MS Report

Hit Spectrum

Compound Structure



DOTRIACONTANE  
Formula C32H66, MW 450, CAS# 544-85-4, Entry# 274478  
A13-52367



14-á-H-PREGNA  
Formula C21H36, MW 288, CAS# NA, Entry# 178939  
14-á-PREGNA



14-á-H-PREGNA  
Formula C21H36, MW 288, CAS# NA, Entry# 178938  
14-á-PREGNA

SI 740, RSI 755, WileyRegistry8e, Entry# 225807, CAS# NA, ISOCHIAPIN B



ISOCHIAPIN B  
Formula C19H22O6, MW 346, CAS# NA, Entry# 225807

| RT    | Compound Name       | Molecular Weight | Molecular Formula | Cas #     | Area % | Library         |
|-------|---------------------|------------------|-------------------|-----------|--------|-----------------|
| 29.73 | DOTRIACONTANE       | 450              | C32H66            | 544-85-4  | 0.67   | WileyRegistry8e |
| 29.73 | 14-á-H-PREGNA       | 288              | C21H36            | NA        | 0.67   | WileyRegistry8e |
| 29.73 | 14-á-H-PREGNA       | 288              | C21H36            | NA        | 0.67   | WileyRegistry8e |
| 29.73 | 17-Pentatriacontene | 490              | C35H70            | 6971-40-0 | 0.67   | mainlib         |

# My GC-MS Report

Hit Spectrum

Compound Structure



DOTRIACONTANE  
Formula C32H66, MW 450, CAS# 544-85-4, Entry# 274478  
AI3-52367



14-á-H-PREGNA  
Formula C21H36, MW 288, CAS# NA, Entry# 178939  
14-á-PREGNA



14-á-H-PREGNA  
Formula C21H36, MW 288, CAS# NA, Entry# 178938  
14-á-PREGNA



17-Pentatriacontene  
Formula C35H70, MW 490, CAS# 6971-40-0, Entry# 21018  
(17E)-17-Pentatriacontene #



| RT    | Compound Name | Molecular Weight | Molecular Formula | Cas #    | Area % | Library         |
|-------|---------------|------------------|-------------------|----------|--------|-----------------|
| 29.80 | DOTRIACONTANE | 450              | C32H66            | 544-85-4 | 0.10   | WileyRegistry8e |
| 29.80 | 14-á-H-PREGNA | 288              | C21H36            | NA       | 0.10   | WileyRegistry8e |
| 29.80 | 14-á-H-PREGNA | 288              | C21H36            | NA       | 0.10   | WileyRegistry8e |
| 29.80 | ISOCHIAPIN B  | 346              | C19H22O6          | NA       | 0.10   | WileyRegistry8e |

# My GC-MS Report

Hit Spectrum

Compound Structure



DOTRIACONTANE  
Formula C32H66, MW 450, CAS# 544-85-4, Entry# 274478  
A13-52367



14-á-H-PREGNA  
Formula C21H36, MW 288, CAS# NA, Entry# 178939  
14-á-PREGNA



14-á-H-PREGNA  
Formula C21H36, MW 288, CAS# NA, Entry# 178938  
14-á-PREGNA

SI 747, RSI 768, WileyRegistry8e, Entry# 225807, CAS# NA, ISOCHIAPIN B



ISOCHIAPIN B  
Formula C19H22O6, MW 346, CAS# NA, Entry# 225807

| RT    | Compound Name | Molecular Weight | Molecular Formula | Cas #    | Area % | Library         |
|-------|---------------|------------------|-------------------|----------|--------|-----------------|
| 29.95 | DOTRIACONTANE | 450              | C32H66            | 544-85-4 | 1.57   | WileyRegistry8e |
| 29.95 | 14-á-H-PREGNA | 288              | C21H36            | NA       | 1.57   | WileyRegistry8e |
| 29.95 | 14-á-H-PREGNA | 288              | C21H36            | NA       | 1.57   | WileyRegistry8e |
| 29.95 | ISOCHIAPIN B  | 346              | C19H22O6          | NA       | 1.57   | WileyRegistry8e |

# My GC-MS Report

Hit Spectrum

Compound Structure



DOTRIACONTANE  
Formula C32H66, MW 450, CAS# 544-85-4, Entry# 274478  
A13-52367



14-á-H-PREGNA  
Formula C21H36, MW 288, CAS# NA, Entry# 178939  
14-á-PREGNA



14-á-H-PREGNA  
Formula C21H36, MW 288, CAS# NA, Entry# 178938  
14-á-PREGNA

SI 732, RSI 750, WileyRegistry8e, Entry# 225807, CAS# NA, ISOCHIAPIN B



ISOCHIAPIN B  
Formula C19H22O6, MW 346, CAS# NA, Entry# 225807

| RT    | Compound Name | Molecular Weight | Molecular Formula | Cas #    | Area % | Library         |
|-------|---------------|------------------|-------------------|----------|--------|-----------------|
| 30.21 | DOTRIACONTANE | 450              | C32H66            | 544-85-4 | 3.74   | WileyRegistry8e |
| 30.21 | 14-á-H-PREGNA | 288              | C21H36            | NA       | 3.74   | WileyRegistry8e |
| 30.21 | 14-á-H-PREGNA | 288              | C21H36            | NA       | 3.74   | WileyRegistry8e |
| 30.21 | ISOCHIAPIN B  | 346              | C19H22O6          | NA       | 3.74   | WileyRegistry8e |

# My GC-MS Report

Hit Spectrum

Compound Structure

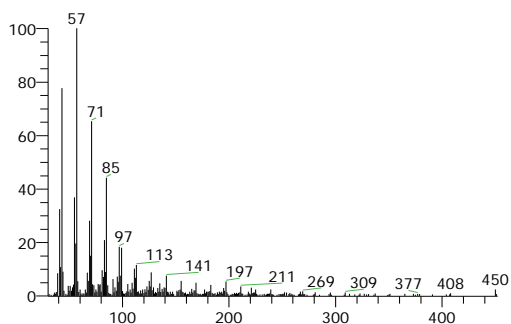

DOTRIACONTANE  
Formula C<sub>32</sub>H<sub>66</sub>, MW 450, CAS# 544-85-4, Entry# 274478  
AI3-52367



14- $\alpha$ -H-PREGNA  
Formula C<sub>21</sub>H<sub>36</sub>, MW 288, CAS# NA, Entry# 178939  
14- $\alpha$ -PREGNA



14- $\alpha$ -H-PREGNA  
Formula C<sub>21</sub>H<sub>36</sub>, MW 288, CAS# NA, Entry# 178938  
14- $\alpha$ -PREGNA

SI 732, RSI 750, WileyRegistry8e, Entry# 225807, CAS# NA, ISOCHIAPIN B



ISOCHIAPIN B  
Formula C<sub>19</sub>H<sub>22</sub>O<sub>6</sub>, MW 346, CAS# NA, Entry# 225807
